# Supplementary material for: An Integrated Strategy for Global Qualitative and Quantitative Profiling of Traditional Chinese Medicine Formulas: Baoyuan Decoction as a Case
Source: PubMed Central journal article supplement (PMC5141425; doi:10.1038/srep38379), 2016-12-07
Supplement: srep38379-s1.pdf [file srep38379-s1.pdf]

## Supplementary data

# **An Integrated Strategy for Global Qualitative and Quantitative Profiling of Traditional Chinese Medicine Formulas: *Baoyuan* Decoction as a Case**

Xiaoli Ma<sup>1,\*</sup> Xiaoyu Guo<sup>1,\*</sup>, Yuelin Song<sup>2</sup>, Lirui Qiao<sup>3</sup>, Wenguang Wang<sup>1</sup>, Mingbo Zhao<sup>1</sup>, Pengfei Tu<sup>1</sup> & Yong Jiang<sup>1</sup>

<sup>1</sup>State Key Laboratory of Natural and Biomimetic Drugs, School of Pharmaceutical Sciences, Peking University, Beijing 100191, People's Republic of China.

<sup>2</sup>Modern Research Center for Traditional Chinese Medicine, Beijing University of Chinese Medicine, Beijing 100029, People's Republic of China.

<sup>3</sup>Waters corporation Shanghai Science & Technology Co Ltd, Shanghai 201206, People's Republic of China.

\*These two authors contributed equally.

Correspondence and requests for materials should be addressed to Y. J. (yongjiang@bjmu.edu.cn).

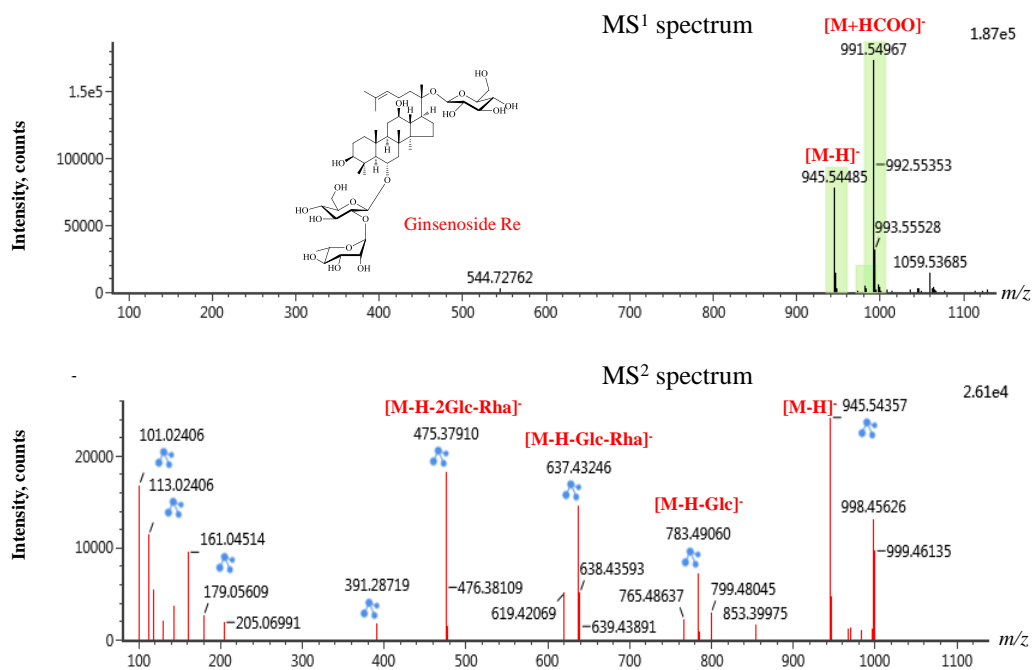

**Figure S1** The accurate MS and MS/MS spectra and the chemical structure of ginsenoside

**Re.** The signals either highlighted in green or tagged in blue were chosen by UNIFI for rapid structural identification.

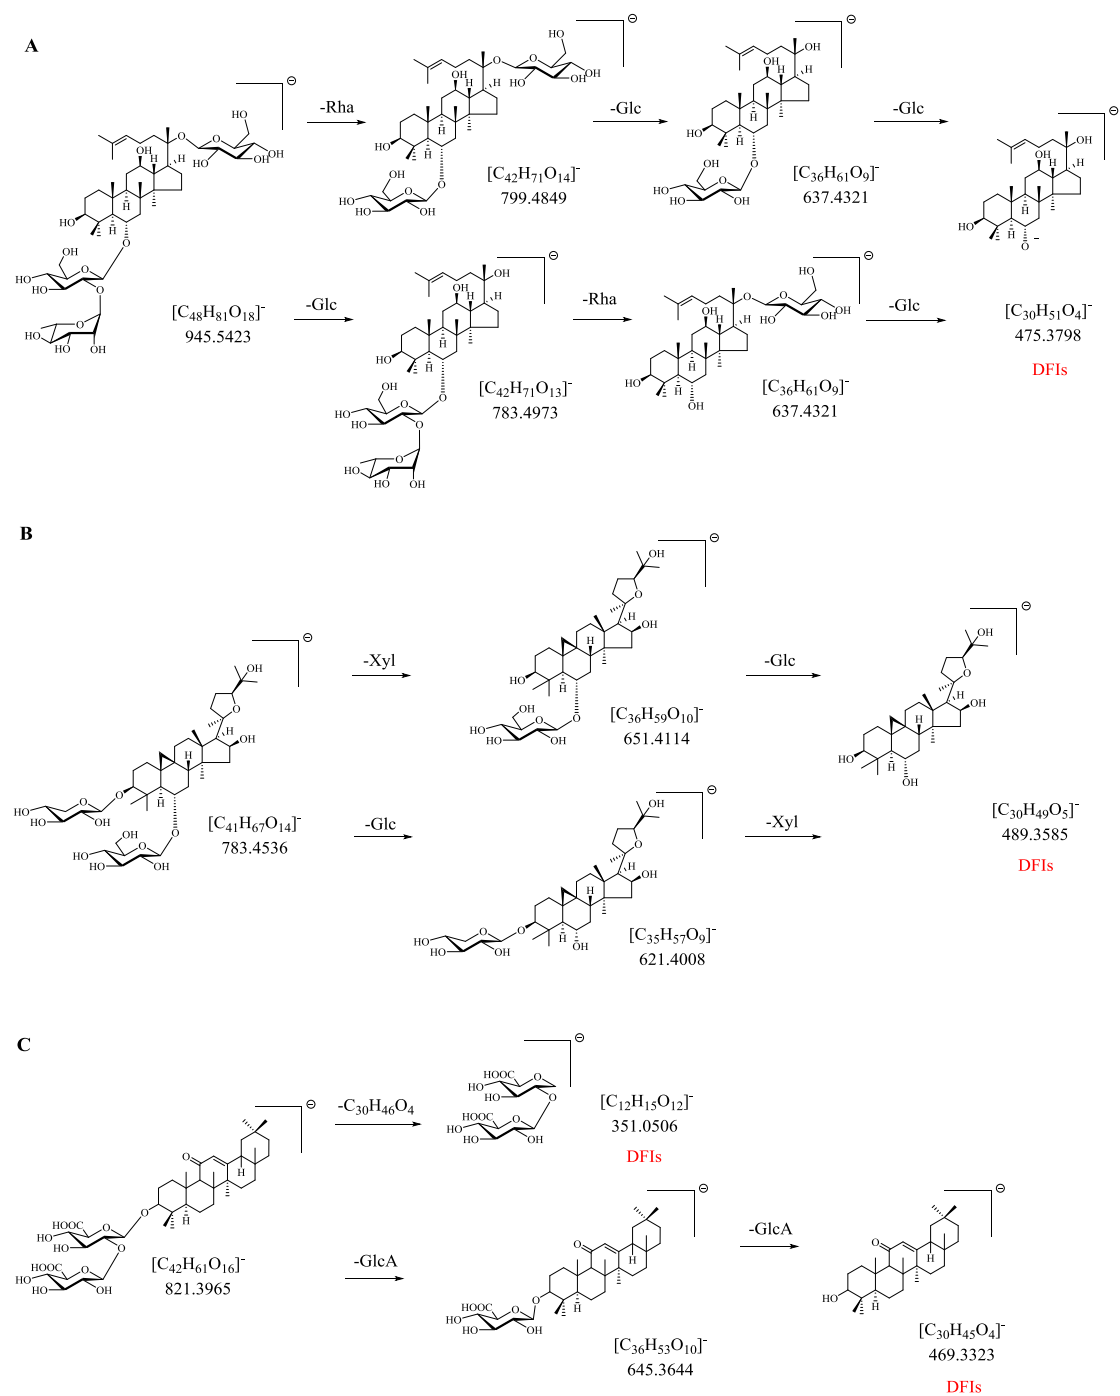

**Figure S2** The proposed fragmentation pathways and main diagnostic fragment ions (DFIs) for ginsenoside Re (A), astragaloside IV (B), and glycyrrhizic acid (C).

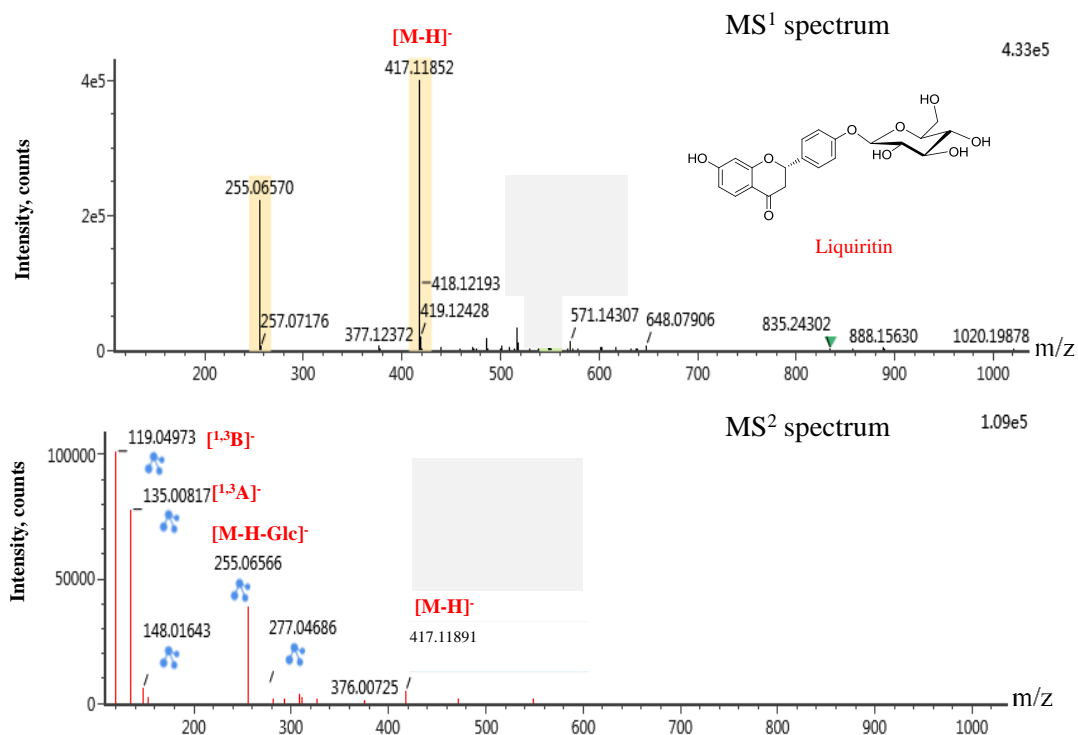

**Figure S3** The accurate MS and MS/MS spectra and the chemical structure of liquiritin. The signals either highlighted in yellow or tagged in blue were chosen by UNIFI for rapid structural identification.

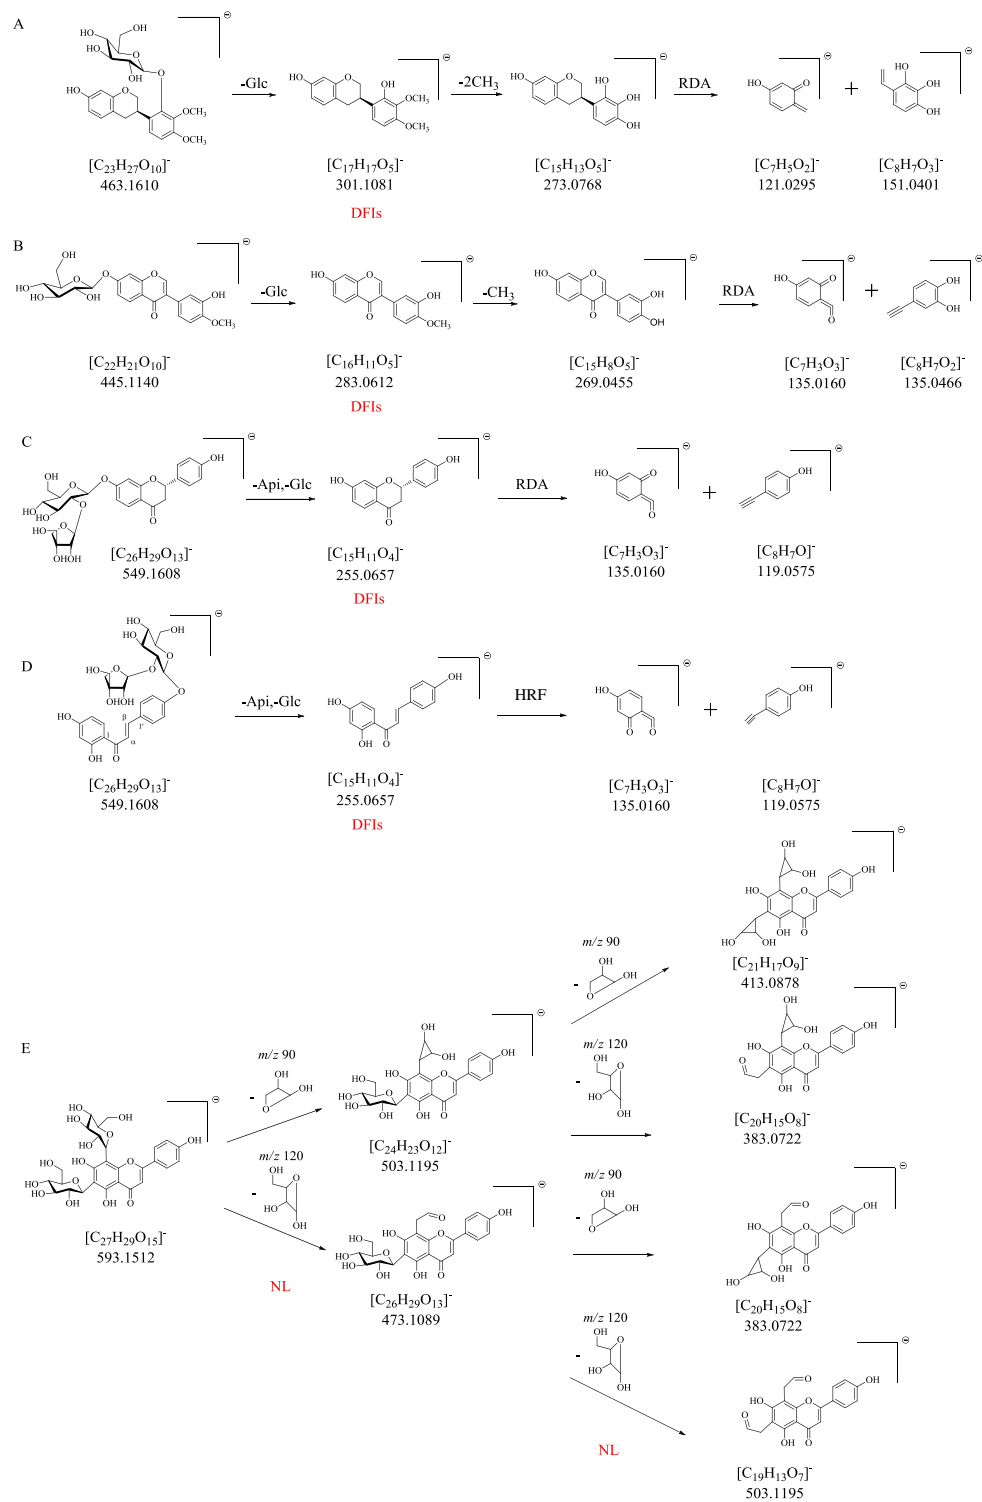

### The aglycones of ginsenosides:

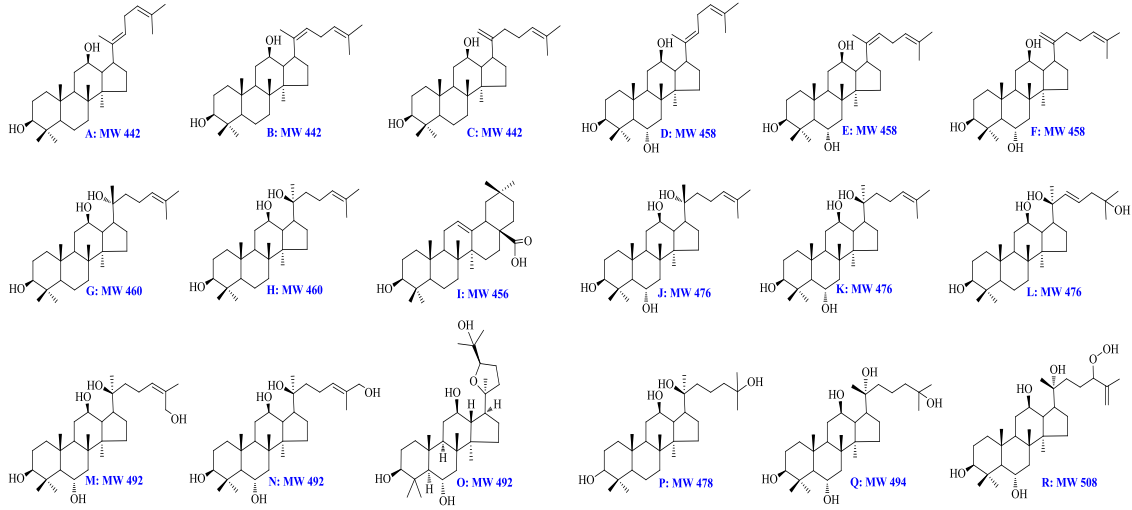

### The aglycone of astragalosides:

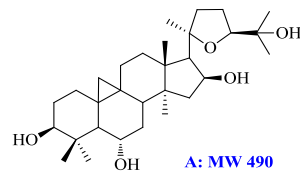

### The aglycones of licorice saponins:

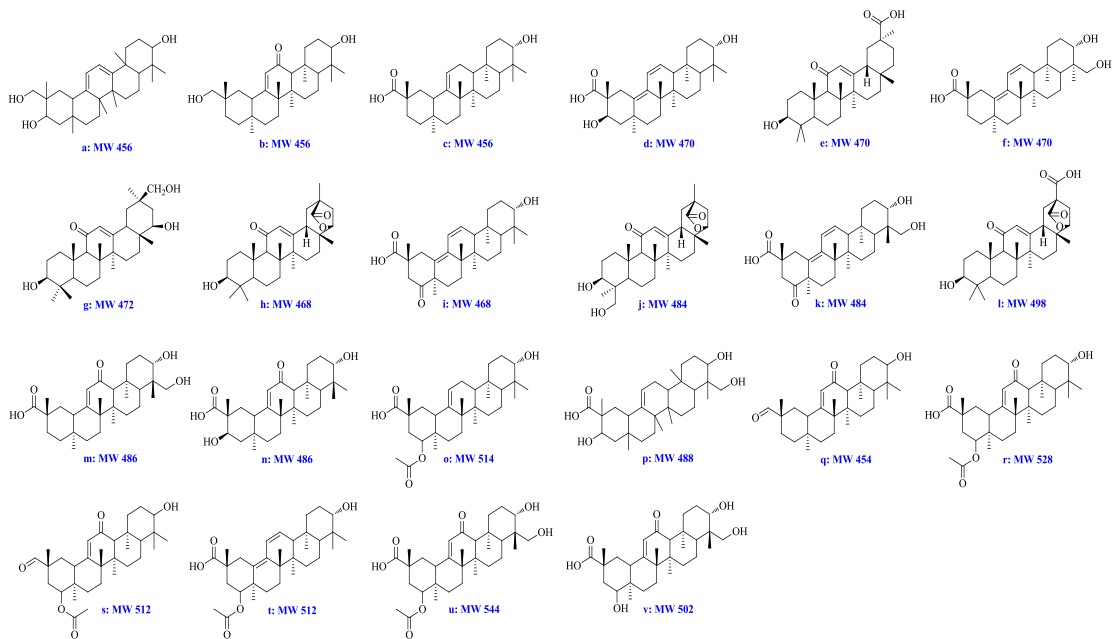

**The aglycones of flavonoids:**

| Aglycone | <i>m/z</i> | Predictive formula                             | Characteristic fragments | Group | OH | OCH <sub>3</sub> |
|----------|------------|------------------------------------------------|--------------------------|-------|----|------------------|
| FA-1     | 255.0663   | C <sub>15</sub> H <sub>11</sub> O <sub>4</sub> | 135.01,119.05            | I     | 2  | 0                |
| FA-2     | 271.0612   | C <sub>15</sub> H <sub>11</sub> O <sub>5</sub> | 151.00,119.05            | I     | 3  | 0                |
| FA-3     | 253.0506   | C <sub>15</sub> H <sub>9</sub> O <sub>4</sub>  | 135.02,117.04            | II    | 2  | 0                |
| FA-4     | 267.0663   | C <sub>16</sub> H <sub>11</sub> O <sub>4</sub> | 252.04,193.05,135.01     | II    | 1  | 1                |
| FA-5     | 269.0455   | C <sub>15</sub> H <sub>9</sub> O <sub>5</sub>  | 151.00,117.03            | II    | 3  | 0                |
| FA-6     | 269.0814   | C <sub>16</sub> H <sub>13</sub> O <sub>4</sub> | 270.05, 119.05           | I     | 2  | 1                |
| FA-7     | 283.0612   | C <sub>16</sub> H <sub>11</sub> O <sub>5</sub> | 268.03,193.05,135.01     | II    | 2  | 1                |
| FA-8     | 285.0612   | C <sub>16</sub> H <sub>11</sub> O <sub>5</sub> | 270.05,119.05            | I     | 2  | 1                |
| FA-9     | 289.0712   | C <sub>15</sub> H <sub>13</sub> O <sub>6</sub> | 137.0238,109.0196        | III   | 5  | 0                |
| FA-10    | 299.0561   | C <sub>16</sub> H <sub>11</sub> O <sub>6</sub> | 284.03,135.02            | II    | 3  | 1                |
| FA-11    | 299.0925   | C <sub>17</sub> H <sub>15</sub> O <sub>5</sub> | 284.07,269.04            | IV    | 1  | 2                |
| FA-12    | 301.1099   | C <sub>17</sub> H <sub>17</sub> O <sub>5</sub> | 271.06,193.05,135.05     | III   | 3  | 2                |

Group I:

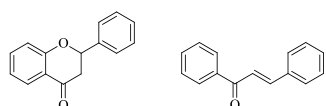

Group II:

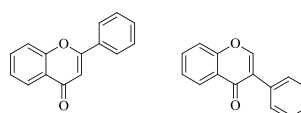

Group III:

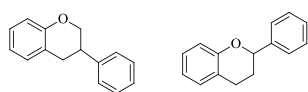

Group IV:

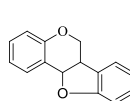

**Figure S5 The common aglycones of ginsenosides, astragalosides, licorice saponins, and flavonoids in BYD.**

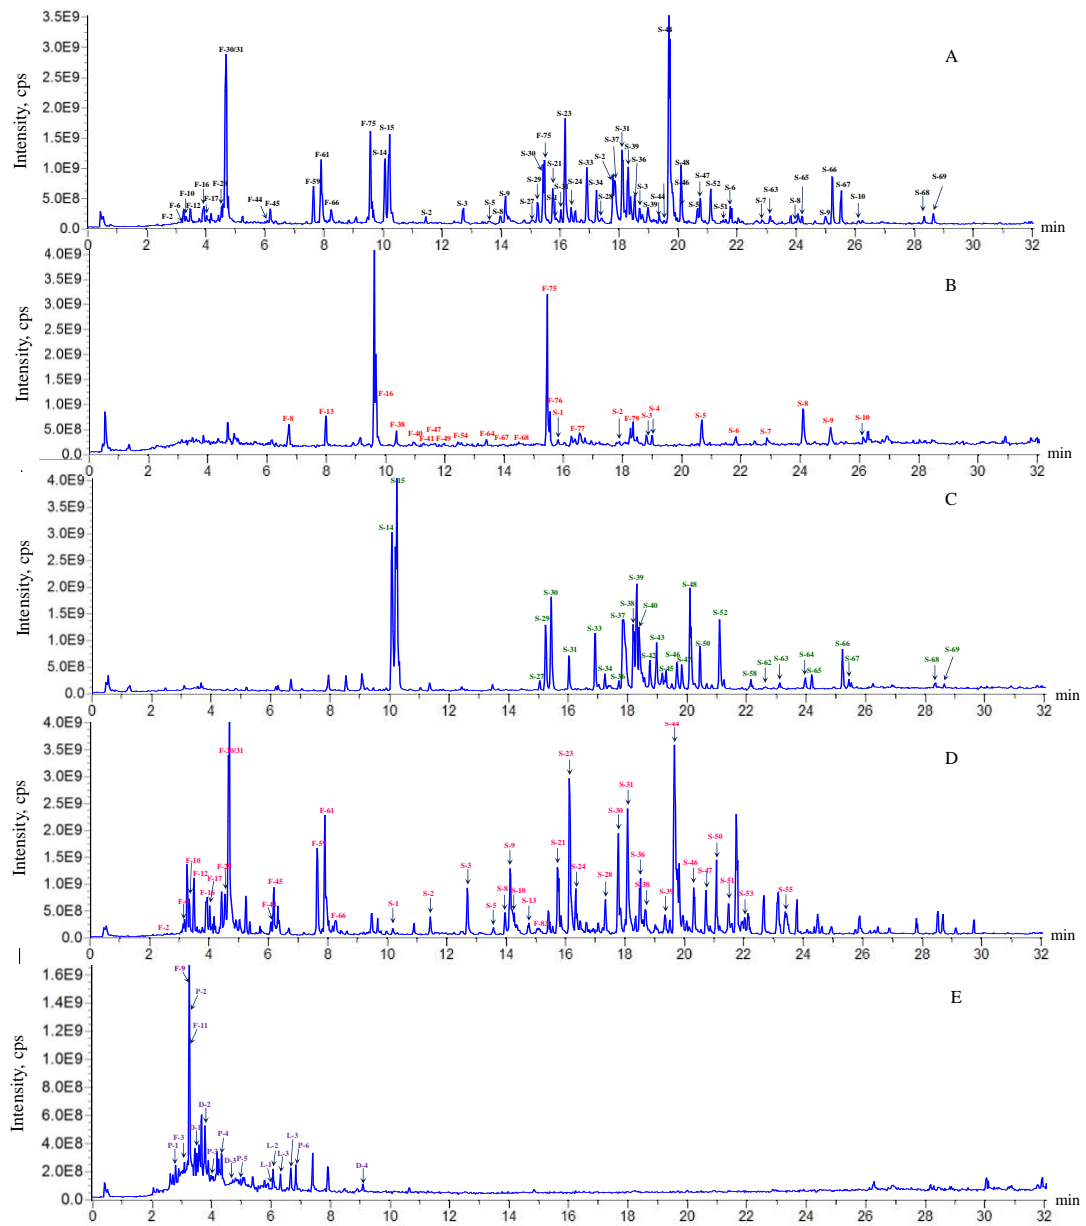

**Figure S6** The base peak chromatograms (BPCs) of *Baoyuan* decoction extract (A), *Astragali Radix* extract (B), *Ginseng Radix* extract (C), *Glycyrrhiza Radix et Rhizoma Praeparata Cum Melle* extract (D), and *Cinnamomi Cortex* extract (E) by UPLC/Qtrap-MS in negative mode.



**Table S1 The MS/MS spectral data of chemical constituents of *Baoyuan* decoction by UPLC/Q-TOF-MS.**

| No.                              | $t_R$<br>(min) | [Aglycone-H] <sup>-</sup>                                       | Fragment ions                                                                                                                                                                              |
|----------------------------------|----------------|-----------------------------------------------------------------|--------------------------------------------------------------------------------------------------------------------------------------------------------------------------------------------|
| S <sub>GU</sub> -1 <sup>m</sup>  | 9.5            | p [M-H-2GlcA] <sup>-</sup>                                      | 663.3879 [M-H-GlcA] <sup>-</sup> , 351.0556<br>[2GlcA-H] <sup>-</sup><br>793.4360 [M-H-GlcA] <sup>-</sup> , 617.3657                                                                       |
| S <sub>GU</sub> -2 <sup>m</sup>  | 10.94          | g [M-H-2GlcA-Rha] <sup>-</sup>                                  | [M-H-2GlcA] <sup>-</sup> , 471.3477<br>[M-H-2GlcA-Rha] <sup>-</sup> , 351.0558 [2GlcA-H] <sup>-</sup><br>647.3791 [M-H-GlcA] <sup>-</sup> , 471.3448                                       |
| S <sub>GU</sub> -3 <sup>*C</sup> | 12.2           | g [M-H-2GlcA] <sup>-</sup>                                      | [M-H-2GlcA] <sup>-</sup> , 351.0563 [2GlcA-H] <sup>-</sup><br>823.4045 [M-H-Rha] <sup>-</sup> , 471.3477                                                                                   |
| S <sub>GU</sub> -4 <sup>m</sup>  | 12.33          | g [M-H-2GlcA-Rha] <sup>-</sup>                                  | [M-H-2GlcA-Rha] <sup>-</sup> , 351.0558 [2GlcA-H] <sup>-</sup><br>985.4524 [M-H-C <sub>2</sub> H <sub>2</sub> O] <sup>-</sup> , 823.3965                                                   |
| S <sub>GU</sub> -5 <sup>m</sup>  | 12.82          | g [M-H-2GlcA-Glc- C <sub>2</sub> H <sub>2</sub> O] <sup>-</sup> | [M-H-C <sub>2</sub> H <sub>2</sub> O-Glc] <sup>-</sup> , 471.3505<br>[M-H-2GlcA-Glc-C <sub>2</sub> H <sub>2</sub> O] <sup>-</sup> , 351.0581<br>[2GlcA-H] <sup>-</sup>                     |
| S <sub>GU</sub> -6 <sup>C</sup>  | 12.97          | j/k [M-H-2GlcA] <sup>-</sup>                                    | 659.3494 [M-H-GlcA] <sup>-</sup> , 483.3309<br>[M-H-2GlcA] <sup>-</sup> , 351.0563 [2GlcA-H] <sup>-</sup><br>647.3791 [M-H-GlcA] <sup>-</sup> , 471.3448                                   |
| S <sub>GU</sub> -7 <sup>m</sup>  | 13.06          | g [M-H-2GlcA] <sup>-</sup>                                      | [M-H-2GlcA] <sup>-</sup> , 351.0563 [2GlcA-H] <sup>-</sup><br>837.3893 [M-H-Glc] <sup>-</sup> , 661.3572                                                                                   |
| S <sub>GU</sub> -8 <sup>m</sup>  | 13.4           | m/n [M-H-2GlcA-Glc] <sup>-</sup>                                | [M-H-GlcA-Glc] <sup>-</sup> , 485.3264<br>[M-H-2GlcA-Glc] <sup>-</sup> , 351.0562 [2GlcA-H] <sup>-</sup><br>719.3635 [M-H-GlcA] <sup>-</sup> , 351.0554                                    |
| S <sub>GU</sub> -9 <sup>*</sup>  | 13.5           | u [M-H-2GlcA] <sup>-</sup>                                      | [2GlcA-H] <sup>-</sup><br>645.3670 [M-H-GlcA] <sup>-</sup> , 469.3323                                                                                                                      |
| S <sub>GU</sub> -10 <sup>C</sup> | 13.6           | d/e/f [M-H-2GlcA] <sup>-</sup>                                  | [M-H-2GlcA] <sup>-</sup> , 425.3443<br>[M-H-2GlcA-CO <sub>2</sub> ] <sup>-</sup> , 351.0577 [2GlcA-H] <sup>-</sup>                                                                         |
| S <sub>GU</sub> -11 <sup>C</sup> | 13.68          | v [M-H-2GlcA] <sup>-</sup>                                      | 501.3202 [M-H-2GlcA] <sup>-</sup><br>851.4082 [M-H-GlcA] <sup>-</sup> , 499.3202                                                                                                           |
| S <sub>GU</sub> -12 <sup>m</sup> | 14.07          | 499.3 [M-H-2GlcA] <sup>-</sup>                                  | [M-H-2GlcA] <sup>-</sup> , 351.0552 [2GlcA-H] <sup>-</sup><br>719.3635 [M-H-GlcA] <sup>-</sup> , 351.0554                                                                                  |
| S <sub>GU</sub> -13 <sup>m</sup> | 14.13          | u [M-H-2GlcA] <sup>-</sup>                                      | [2GlcA-H] <sup>-</sup><br>777.4429 [M-H-GlcA] <sup>-</sup> , 469.3299                                                                                                                      |
| S <sub>GU</sub> -14 <sup>m</sup> | 14.17          | d/e/f [M-H-2GlcA-Ara/Xyl] <sup>-</sup>                          | [M-H-2GlcA-Ara/Xyl] <sup>-</sup><br>647.3791 [M-H-GlcA] <sup>-</sup> , 471.3448                                                                                                            |
| S <sub>GU</sub> -15 <sup>C</sup> | 14.38          | g [M-H-2GlcA] <sup>-</sup>                                      | [M-H-2GlcA] <sup>-</sup> , 351.0563 [2GlcA-H] <sup>-</sup><br>951.4619 [M-H-C <sub>2</sub> H <sub>4</sub> O <sub>2</sub> ] <sup>-</sup> , 599.3514                                         |
| S <sub>GU</sub> -16 <sup>m</sup> | 14.6           | o [M-H-2GlcA-Rha] <sup>-</sup>                                  | [M-H-C <sub>2</sub> H <sub>4</sub> O <sub>2</sub> -2GlcA] <sup>-</sup> , 497.1150<br>[2GlcA·Rha-H] <sup>-</sup> , 467.3169<br>[M-H-C <sub>2</sub> H <sub>4</sub> O-2GlcA-Rha] <sup>-</sup> |

|                                   |       |                                                               |                                                                                                                                                                            |
|-----------------------------------|-------|---------------------------------------------------------------|----------------------------------------------------------------------------------------------------------------------------------------------------------------------------|
| S <sub>GU</sub> -17 <sup>C</sup>  | 15    | j/k [M-H-2GlcA] <sup>-</sup>                                  | 659.3494 [M-H-GlcA] <sup>-</sup> , 483.3130 [M-H-2GlcA] <sup>-</sup>                                                                                                       |
| S <sub>GU</sub> -18 <sup>C</sup>  | 15.01 | l [M-H-2GlcA] <sup>-</sup>                                    | 497.2903 [M-H-2GlcA] <sup>-</sup>                                                                                                                                          |
| S <sub>GU</sub> -19 <sup>m</sup>  | 15.16 | j/k [M-H-2GlcA] <sup>-</sup>                                  | 659.3494 [M-H-GlcA] <sup>-</sup> , 483.3130 [M-H-2GlcA] <sup>-</sup> , 351.0554 [2GlcA-H] <sup>-</sup>                                                                     |
| S <sub>GU</sub> -20 <sup>C</sup>  | 15.22 | r [M-H-3GlcA] <sup>-</sup>                                    | 849.3576 [M-H-GlcA] <sup>-</sup> , 497.1150 [2GlcA·Rha-H] <sup>-</sup> , 351.0554 [2GlcA-H] <sup>-</sup>                                                                   |
| S <sub>GU</sub> -21 <sup>*C</sup> | 15.31 | e [M-H-2GlcA-Glc] <sup>-</sup>                                | 821.3964 [M-H-Glc] <sup>-</sup> , 645.3637 [M-H-GlcA-Glc] <sup>-</sup> , 469.3326 [M-H-2GlcA-Glc] <sup>-</sup> , 351.0565 [2GlcA-H] <sup>-</sup>                           |
| S <sub>GU</sub> -22 <sup>m</sup>  | 15.75 | r [M-H-GlcA-Glc-C <sub>2</sub> H <sub>2</sub> O] <sup>-</sup> | 703.3715 [M-H-Glc] <sup>-</sup> , 527.3386 [M-H-GlcA-Glc] <sup>-</sup> , 485.3268 [M-H-GlcA-Glc-C <sub>2</sub> H <sub>2</sub> O] <sup>-</sup>                              |
| S <sub>GU</sub> -23 <sup>*C</sup> | 15.87 | r [M-H-2GlcA] <sup>-</sup>                                    | 703.3703 [M-H-GlcA] <sup>-</sup> , 527.3374 [M-H-2GlcA] <sup>-</sup> , 351.0554 [2GlcA-H] <sup>-</sup>                                                                     |
| S <sub>GU</sub> -24 <sup>m</sup>  | 16.03 | m/n [M-H-2GlcA] <sup>-</sup>                                  | 661.3601 [M-H-GlcA] <sup>-</sup> , 485.3268 [M-H-2GlcA] <sup>-</sup> , 351.0559 [2GlcA-H] <sup>-</sup>                                                                     |
| S <sub>GU</sub> -25 <sup>m</sup>  | 16.26 | m/n [M-H-2Glc-Xyl] <sup>-</sup>                               | 617.3721 [M-H-2GlcA] <sup>-</sup> , 485.3271 [M-H-2Glc-Xyl] <sup>-</sup> , 351.0558 [2GlcA-H] <sup>-</sup>                                                                 |
| S <sub>GU</sub> -26 <sup>m</sup>  | 16.3  | r [M-H-GlcA-Glc] <sup>-</sup>                                 | 703.3715 [M-H-Glc] <sup>-</sup> , 527.3386 [M-H-GlcA-Glc] <sup>-</sup>                                                                                                     |
| S <sub>GU</sub> -27 <sup>m</sup>  | 16.37 | m/n [M-H-2GlcA-Ara/Xyl] <sup>-</sup>                          | 617.3721 [M-H-2GlcA] <sup>-</sup> , 485.3271 [M-H-2GlcA-Ara/Xyl] <sup>-</sup> , 351.0558 [2GlcA-H] <sup>-</sup>                                                            |
| S <sub>GU</sub> -28 <sup>C</sup>  | 16.53 | m/n [M-H-GlcA-Glc] <sup>-</sup>                               | 661.3524 [M-H-Glc] <sup>-</sup> , 485.3271 [M-H-GlcA-Glc] <sup>-</sup>                                                                                                     |
| S <sub>GU</sub> -29 <sup>m</sup>  | 16.83 | a/b/c [M-H-2GlcA-Rha] <sup>-</sup>                            | 497.1002 [2GlcA·Rha-H] <sup>-</sup>                                                                                                                                        |
| S <sub>GU</sub> -30 <sup>*C</sup> | 17.2  | h [M-H-2GlcA] <sup>-</sup>                                    | 643.3481 [M-H-GlcA] <sup>-</sup> , 467.3163 [M-H-2GlcA] <sup>-</sup>                                                                                                       |
| S <sub>GU</sub> -31 <sup>*C</sup> | 17.41 | m [M-H-2GlcA] <sup>-</sup>                                    | 661.3601 [M-H-GlcA] <sup>-</sup> , 485.3268 [M-H-2GlcA] <sup>-</sup> , 351.0559 [2GlcA-H] <sup>-</sup>                                                                     |
| S <sub>GU</sub> -32 <sup>m</sup>  | 17.51 | a/b/c [M-H-2GlcA] <sup>-</sup>                                | 631.3805 [M-H-GlcA] <sup>-</sup> , 455.3443 [M-H-2GlcA] <sup>-</sup>                                                                                                       |
| S <sub>GU</sub> -33 <sup>C</sup>  | 17.53 | m/n [M-H-GlcA-Glc] <sup>-</sup>                               | 661.3524 [M-H-Glc] <sup>-</sup> , 485.3271 [M-H-GlcA-Glc] <sup>-</sup>                                                                                                     |
| S <sub>GU</sub> -34 <sup>m</sup>  | 17.75 | m/n [M-H-2GlcA] <sup>-</sup>                                  | 661.3524 [M-H-Glc] <sup>-</sup> , 485.3271 [M-H-GlcA-Glc] <sup>-</sup> , 351.0559 [2GlcA-H] <sup>-</sup>                                                                   |
| S <sub>GU</sub> -35 <sup>C</sup>  | 17.78 | h/i [M-H-2GlcA] <sup>-</sup>                                  | 643.3510 [M-H-GlcA] <sup>-</sup> , 467.467.3163 [M-H-2GlcA] <sup>-</sup> , 351.0559 [2GlcA-H] <sup>-</sup>                                                                 |
| S <sub>GU</sub> -36 <sup>m</sup>  | 18    | s/t [M-H-2GlcA] <sup>-</sup>                                  | 687.3720 [M-H-GlcA] <sup>-</sup> , 511.3531 [M-H-2GlcA] <sup>-</sup> , 469.3323 [M-H-2GlcA-C <sub>2</sub> H <sub>2</sub> O] <sup>-</sup> , 351.0559 [2GlcA-H] <sup>-</sup> |

|                                   |       |                                    |                                                                                                                                                                                                     |
|-----------------------------------|-------|------------------------------------|-----------------------------------------------------------------------------------------------------------------------------------------------------------------------------------------------------|
| S <sub>GU</sub> -37 <sup>m</sup>  | 18.12 | d/e/f [M-H-2GlcA-Xyl] <sup>-</sup> | 777.4111 [M-H-GlcA] <sup>-</sup> , 469.3299<br>[M-H-2GlcA-Xyl] <sup>-</sup> , 351.0542 [2GlcA-H] <sup>-</sup><br>703.3664 [M-H-GlcA] <sup>-</sup> , 527.3397<br>[M-H-2GlcA] <sup>-</sup> , 485.3320 |
| S <sub>GU</sub> -38 <sup>m</sup>  | 18.3  | r [M-H-2GlcA] <sup>-</sup>         | [M-H-2GlcA-C <sub>2</sub> H <sub>2</sub> O] <sup>-</sup> , 351.0565<br>[2GlcA-H] <sup>-</sup><br>703.3715 [M-H-Glc] <sup>-</sup> , 527.3386                                                         |
| S <sub>GU</sub> -39 <sup>m</sup>  | 18.39 | r [M-H-GlcA-Glc] <sup>-</sup>      | [M-H-GlcA-Glc] <sup>-</sup> , 485.3268<br>[M-H-2GlcA-C <sub>2</sub> H <sub>2</sub> O] <sup>-</sup>                                                                                                  |
| S <sub>GU</sub> -40 <sup>m</sup>  | 18.48 | 441.3 [M-H-2GlcA] <sup>-</sup>     | 617.3752 [M-H-GlcA] <sup>-</sup> , 441.3302<br>[M-H-2GlcA] <sup>-</sup> , 351.0577 [2GlcA-H] <sup>-</sup><br>821.3983 [M-H-Rha] <sup>-</sup> , 645.3670                                             |
| S <sub>GU</sub> -41 <sup>m</sup>  | 18.5  | d/e/f [M-H-2GlcA-Rha] <sup>-</sup> | [M-H-Rha-GlcA] <sup>-</sup> , 497.1002<br>[2GlcA-Rha-H] <sup>-</sup> , 469.3323<br>[M-H-Rha-2GlcA] <sup>-</sup>                                                                                     |
| S <sub>GU</sub> -42 <sup>C</sup>  | 18.66 | m/n [M-H-2GlcA] <sup>-</sup>       | 661.3601 [M-H-GlcA] <sup>-</sup> , 485.3268<br>[M-H-2GlcA] <sup>-</sup> , 351.0559 [2GlcA-H] <sup>-</sup><br>689.3898 [M-H-GlcA] <sup>-</sup> , 513.3629                                            |
| S <sub>GU</sub> -43 <sup>m</sup>  | 18.75 | o [M-H-2GlcA] <sup>-</sup>         | [M-H-2GlcA] <sup>-</sup><br>645.3670 [M-H-GlcA] <sup>-</sup> , 469.3323                                                                                                                             |
| S <sub>GU</sub> -44 <sup>*C</sup> | 19.01 | e [M-H-2GlcA] <sup>-</sup>         | [M-H-2GlcA] <sup>-</sup> , 351.0577 [2GlcA-H] <sup>-</sup><br>645.3670 [M-H-GlcA] <sup>-</sup> , 469.3323                                                                                           |
| S <sub>GU</sub> -45 <sup>*C</sup> | 19.11 | e [M-H-2GlcA] <sup>-</sup>         | [M-H-2GlcA] <sup>-</sup> , 351.0577 [2GlcA-H] <sup>-</sup><br>631.3822 [M-H-GlcA] <sup>-</sup> , 469.3297                                                                                           |
| S <sub>GU</sub> -46 <sup>m</sup>  | 19.23 | d/e/f [M-H-GlcA-Glc] <sup>-</sup>  | [M-H-GlcA-Glc] <sup>-</sup><br>631.3822 [M-H-GlcA] <sup>-</sup> , 469.3297                                                                                                                          |
| S <sub>GU</sub> -47 <sup>C</sup>  | 19.7  | d/e/f [M-H-GlcA-Glc] <sup>-</sup>  | [M-H-GlcA-Glc] <sup>-</sup><br>631.3822 [M-H-GlcA] <sup>-</sup> , 469.3323                                                                                                                          |
| S <sub>GU</sub> -48 <sup>C</sup>  | 20.01 | a/b/c [M-H-2GlcA] <sup>-</sup>     | [M-H-2GlcA] <sup>-</sup> , 351.0577 [2GlcA-H] <sup>-</sup><br>631.3822 [M-H-GlcA] <sup>-</sup> , 469.3323                                                                                           |
| S <sub>GU</sub> -49 <sup>m</sup>  | 20.14 | a/b/c [M-H-2GlcA] <sup>-</sup>     | [M-H-2GlcA] <sup>-</sup> , 351.0577 [2GlcA-H] <sup>-</sup><br>645.3670 [M-H-GlcA] <sup>-</sup> , 469.3323                                                                                           |
| S <sub>GU</sub> -50 <sup>m</sup>  | 20.39 | d/e/f [M-H-2GlcA] <sup>-</sup>     | [M-H-2GlcA] <sup>-</sup> , 351.0577 [2GlcA-H] <sup>-</sup><br>645.3670 [M-H-GlcA] <sup>-</sup> , 469.3323                                                                                           |
| S <sub>GU</sub> -51 <sup>C</sup>  | 20.79 | d/e/f [M-H-2GlcA] <sup>-</sup>     | [M-H-2GlcA] <sup>-</sup> , 351.0577 [2GlcA-H] <sup>-</sup><br>601.3758 [M-H-GlcA] <sup>-</sup> , 469.3323                                                                                           |
| S <sub>GU</sub> -52 <sup>m</sup>  | 21.1  | d/e/f [M-H-GlcA-Glc] <sup>-</sup>  | [M-H-GlcA-Glc] <sup>-</sup><br>647.3791 [M-H-GlcA] <sup>-</sup> , 471.3448                                                                                                                          |
| S <sub>GU</sub> -53 <sup>*C</sup> | 21.49 | g [M-H-2GlcA] <sup>-</sup>         | [M-H-2GlcA] <sup>-</sup> , 351.0563 [2GlcA-H] <sup>-</sup><br>629.3651 [M-H-GlcA] <sup>-</sup> , 453.3201                                                                                           |
| S <sub>GU</sub> -54 <sup>C</sup>  | 22.5  | q [M-H-2GlcA] <sup>-</sup>         | [M-H-2GlcA] <sup>-</sup> , 351.0561 [2GlcA-H] <sup>-</sup><br>631.3822 [M-H-GlcA] <sup>-</sup> , 455.3515                                                                                           |
| S <sub>GU</sub> -55 <sup>*C</sup> | 22.98 | c [M-H-2GlcA] <sup>-</sup>         | [M-H-2GlcA] <sup>-</sup> , 351.0562 [2GlcA-H] <sup>-</sup><br>425.3417 [M-H-CO <sub>2</sub> ] <sup>-</sup>                                                                                          |
| S <sub>GU</sub> -56 <sup>m</sup>  | 29.59 | e [M-H] <sup>-</sup>               |                                                                                                                                                                                                     |

|                                  |       |                                      |                                                                                                                                                                                                              |
|----------------------------------|-------|--------------------------------------|--------------------------------------------------------------------------------------------------------------------------------------------------------------------------------------------------------------|
| S <sub>AM</sub> -1 <sup>C</sup>  | 15.02 | 489.4 [M-H-2Glc-Xyl] <sup>-</sup>    | 783.4547 [M-H-Glc] <sup>-</sup> , 621.4390 [M-H-2Glc] <sup>-</sup> , 489.3642 [M-H-2Glc-Xyl] <sup>-</sup>                                                                                                    |
| S <sub>AM</sub> -2 <sup>C</sup>  | 16.8  | 489.4 [M-H-2Glc-Xyl] <sup>-</sup>    | 783.4547 [M-H-Glc] <sup>-</sup> , 621.4390 [M-H-2Glc] <sup>-</sup> , 489.3642 [M-H-2Glc-Xyl] <sup>-</sup>                                                                                                    |
| S <sub>AM</sub> -3* <sup>C</sup> | 17.9  | 489.4 [M-H-Glc-Xyl] <sup>-</sup>     | 489.3587 [M-H-Glc-Xyl] <sup>-</sup>                                                                                                                                                                          |
| S <sub>AM</sub> -4* <sup>C</sup> | 18.1  | 489.4 [M-H-Glc-Xyl] <sup>-</sup>     | 621.4390 [M-H-Glc] <sup>-</sup> , 489.3642 [M-H-Glc-Xyl] <sup>-</sup>                                                                                                                                        |
| S <sub>AM</sub> -5* <sup>C</sup> | 19.77 | 489.4 [M-H-Ac-Glc-Xyl] <sup>-</sup>  | 783.4547 [M-H-Ac] <sup>-</sup> , 621.4390 [M-H-Ac-Glc] <sup>-</sup> , 489.3642 [M-H-Ac-Glc-Xyl] <sup>-</sup>                                                                                                 |
| S <sub>AM</sub> -6 <sup>C</sup>  | 20.89 | 489.4 [M-H-Ac-Xyl-Glc] <sup>-</sup>  | 783.4547 [M-H-Ac] <sup>-</sup> , 621.4390 [M-H-Ac-Glc] <sup>-</sup> , 489.3642 [M-H-Ac-Glc-Xyl] <sup>-</sup>                                                                                                 |
| S <sub>AM</sub> -7* <sup>C</sup> | 21.92 | 489.4 [M-H-Ac-Glc-Xyl] <sup>-</sup>  | 783.4547 [M-H-Ac] <sup>-</sup> , 621.4390 [M-H-Ac-Glc] <sup>-</sup> , 489.3642 [M-H-Ac-Glc-Xyl] <sup>-</sup>                                                                                                 |
| S <sub>AM</sub> -8 <sup>C</sup>  | 23.32 | 489.4 [M-H-2Ac-Glc-Xyl] <sup>-</sup> | 871.4691 [M+HCOO-Ac] <sup>-</sup> , 783.4547 [M-H-2Ac] <sup>-</sup> , 621.4390 [M-H-2Ac-Glc] <sup>-</sup> , 489.3642 [M-H-2Ac-Glc-Xyl] <sup>-</sup>                                                          |
| S <sub>AM</sub> -9* <sup>C</sup> | 24.16 | 489.4 [M-H-2Ac-Glc-Xyl] <sup>-</sup> | 871.4691 [M+HCOO-Ac] <sup>-</sup> , 783.4547 [M-H-2Ac] <sup>-</sup> , 621.4390 [M-H-2Ac-Glc] <sup>-</sup> , 489.3642 [M-H-2Ac-Glc-Xyl] <sup>-</sup>                                                          |
| S <sub>AM</sub> -10 <sup>C</sup> | 25.29 | 489.4 [M-H-2Ac-Glc-Xyl] <sup>-</sup> | 871.4691 [M+HCOO-Ac] <sup>-</sup> , 783.4547 [M-H-2Ac] <sup>-</sup> , 621.4390 [M-H-2Ac-Glc] <sup>-</sup> , 489.3642 [M-H-2Ac-Glc-Xyl] <sup>-</sup>                                                          |
| S <sub>PG</sub> -1 <sup>m</sup>  | 2.79  | Q [M-H-3Glc] <sup>-</sup>            | 817.5058 [M-H-Glc] <sup>-</sup> , 799.4803 [M-H-Glc-H <sub>2</sub> O] <sup>-</sup> , 655.4559 [M-H-2Glc] <sup>-</sup> , 637.4381 [M-H-2Glc-H <sub>2</sub> O] <sup>-</sup> , 493.3892 [M-H-3Glc] <sup>-</sup> |
| S <sub>PG</sub> -2 <sup>m</sup>  | 3.61  | J/K/L [M-H-3Glc] <sup>-</sup>        | 799.4847 [M-H-Glc] <sup>-</sup> , 637.4314 [M-H-2Glc] <sup>-</sup> , 475.3783 [M-H-3Glc] <sup>-</sup> , 391.2837 [M-H-3Glc-C <sub>6</sub> H <sub>12</sub> ] <sup>-</sup>                                     |
| S <sub>PG</sub> -3 <sup>m</sup>  | 3.65  | J/K/L [M-H-4Glc] <sup>-</sup>        | 799.4847 [M-H-Glc] <sup>-</sup> , 637.4314 [M-H-2Glc] <sup>-</sup> , 475.3783 [M-H-3Glc] <sup>-</sup> , 391.2837 [M-H-3Glc-C <sub>6</sub> H <sub>12</sub> ] <sup>-</sup>                                     |
| S <sub>PG</sub> -4 <sup>m</sup>  | 3.86  | Q [M-H-2Glc-Rha] <sup>-</sup>        | 801.5052 [M-H-Glc] <sup>-</sup> , 493.3945 [M-H-2Glc-Rha] <sup>-</sup>                                                                                                                                       |
| S <sub>PG</sub> -5 <sup>m</sup>  | 5.22  | M/N/O [M-H-2Glc-Rha] <sup>-</sup>    | 815.4845 [M-H-Rha] <sup>-</sup> , 653.4266 [M-H-Glc-Rha] <sup>-</sup> , 491.3752 [M-H-2Glc-Rha] <sup>-</sup>                                                                                                 |
| S <sub>PG</sub> -6 <sup>m</sup>  | 7.02  | J/K/L [M-H-3Glc] <sup>-</sup>        | 799.4847 [M-H-Glc] <sup>-</sup> , 637.4314 [M-H-2Glc] <sup>-</sup> , 475.3783 [M-H-3Glc] <sup>-</sup>                                                                                                        |
| S <sub>PG</sub> -7 <sup>m</sup>  | 7.27  | Q [M-H-Glc-Rha] <sup>-</sup>         | 493.3892 [M-H-3Glc] <sup>-</sup>                                                                                                                                                                             |

|                                   |       |                                             |                                                                                                                                                                                                                                                                                                                                        |
|-----------------------------------|-------|---------------------------------------------|----------------------------------------------------------------------------------------------------------------------------------------------------------------------------------------------------------------------------------------------------------------------------------------------------------------------------------------|
| S <sub>PG</sub> -8 <sup>C</sup>   | 7.71  | J/K/L [M-H-2Glc-Xyl] <sup>-</sup>           | 799.4836 [M-H-Xyl] <sup>-</sup> , 637.4317<br>[M-H-Glc-Xyl] <sup>-</sup> , 475.3784<br>[M-H-2Glc-Xyl] <sup>-</sup> , 391.2831<br>[M-H-2Glc-Xyl-C <sub>6</sub> H <sub>12</sub> ] <sup>-</sup>                                                                                                                                           |
| S <sub>PG</sub> -9 <sup>C</sup>   | 7.74  | J/K/L [M-H-3Glc] <sup>-</sup>               | 799.4817 [M-H-Glc] <sup>-</sup> , 637.4340<br>[M-H-2Glc] <sup>-</sup> , 475.3737 [M-H-3Glc] <sup>-</sup><br>799.4836 [M-H-Xyl] <sup>-</sup> ,<br>637.4317[M-H-Glc-Xyl] <sup>-</sup> , 475.3784                                                                                                                                         |
| S <sub>PG</sub> -10 <sup>C</sup>  | 8.39  | J/K/L [M-H-2Glc-Xyl] <sup>-</sup>           | [M-H-2Glc-Xyl] <sup>-</sup> , 391.2831<br>[M-H-2Glc-Xyl-C <sub>6</sub> H <sub>12</sub> ] <sup>-</sup><br>639.4144 [M-H-Glc] <sup>-</sup> , 507.2037                                                                                                                                                                                    |
| S <sub>PG</sub> -11 <sup>m</sup>  | 8.56  | R [M-H-Glc-Xyl] <sup>-</sup>                | [M-H-Glc-Xyl] <sup>-</sup><br>799.4817 [M-H-Glc] <sup>-</sup> , 637.4340                                                                                                                                                                                                                                                               |
| S <sub>PG</sub> -12 <sup>m</sup>  | 8.9   | J/K/L [M-H-3Glc] <sup>-</sup>               | [M-H-2Glc] <sup>-</sup> , 475.3737 [M-H-3Glc] <sup>-</sup><br>799.4817 [M-H-Glc] <sup>-</sup> , 637.4340                                                                                                                                                                                                                               |
| S <sub>PG</sub> -13 <sup>m</sup>  | 9.01  | J/K/L [M-H-3Glc] <sup>-</sup>               | [M-H-2Glc] <sup>-</sup> , 475.3737 [M-H-3Glc] <sup>-</sup><br>637.4314 [M-H-Glc] <sup>-</sup> , 475.3783                                                                                                                                                                                                                               |
| S <sub>PG</sub> -14* <sup>C</sup> | 9.2   | L [M-H-2Glc] <sup>-</sup>                   | [M-H-2Glc] <sup>-</sup> , 391.2837<br>[M-H-2Glc-C <sub>6</sub> H <sub>12</sub> ] <sup>-</sup><br>783.4855 [M-H-Glc] <sup>-</sup> , 637.4304                                                                                                                                                                                            |
| S <sub>PG</sub> -15* <sup>C</sup> | 9.37  | L [M-H-2Glc-Rha] <sup>-</sup>               | [M-H-Glc-Rha] <sup>-</sup> , 475.3775<br>[M-H-2Glc-Rha] <sup>-</sup><br>637.4314 [M-H-Glc] <sup>-</sup> , 475.3783                                                                                                                                                                                                                     |
| S <sub>PG</sub> -16 <sup>C</sup>  | 9.4   | J/K/L [M-H-2Glc] <sup>-</sup>               | [M-H-2Glc] <sup>-</sup> , 391.2837<br>[M-H-2Glc-C <sub>6</sub> H <sub>12</sub> ] <sup>-</sup><br>637.4314 [M-H-Glc] <sup>-</sup> , 475.3783                                                                                                                                                                                            |
| S <sub>PG</sub> -17 <sup>m</sup>  | 9.8   | J/K/L [M-H-2Glc] <sup>-</sup>               | [M-H-2Glc] <sup>-</sup> , 391.2837<br>[M-H-2Glc-C <sub>6</sub> H <sub>12</sub> ] <sup>-</sup><br>637.4314 [M-H-Glc] <sup>-</sup> , 475.3783                                                                                                                                                                                            |
| S <sub>PG</sub> -18 <sup>m</sup>  | 10.12 | J/K/L [M-H-2Glc] <sup>-</sup>               | [M-H-2Glc] <sup>-</sup> , 391.2837<br>[M-H-2Glc-C <sub>6</sub> H <sub>12</sub> ] <sup>-</sup><br>817.5058 [M-H-Glc] <sup>-</sup> , 799.4803<br>[M-H-Glc-H <sub>2</sub> O] <sup>-</sup> , 655.4559 [M-H-2Glc] <sup>-</sup> ,                                                                                                            |
| S <sub>PG</sub> -19 <sup>m</sup>  | 10.86 | Q [M-H-2Glc-Rha] <sup>-</sup>               | 637.4381 [M-H-2Glc-H <sub>2</sub> O] <sup>-</sup> , 493.3875<br>[M-H-2Glc-Rha] <sup>-</sup> , 475.3732<br>[M-H-2Glc-Rha-H <sub>2</sub> O] <sup>-</sup> , 375.7589<br>[M-H-2Glc-Rha-H <sub>2</sub> O-C <sub>6</sub> H <sub>12</sub> ] <sup>-</sup><br>945.5423 [M-H-Ac] <sup>-</sup> , 799.4847<br>[M-H-Ac-Rha] <sup>-</sup> , 637.4314 |
| S <sub>PG</sub> -20 <sup>m</sup>  | 10.9  | J/K/L [M-H-Ac-2Glc-Rha] <sup>-</sup>        | [M-H-Ac-Glc-Rha] <sup>-</sup> , 475.3783<br>[M-H-Ac-2Glc-Rha] <sup>-</sup> , 391.2837<br>[M-H-Ac-2Glc-Rha-C <sub>6</sub> H <sub>12</sub> ] <sup>-</sup>                                                                                                                                                                                |
| S <sub>PG</sub> -21 <sup>m</sup>  | 11.5  | J/K/L<br>[M-H-Glc-Rha-Xyl/Ara] <sup>-</sup> | 753.4858 [M-H-Glc] <sup>-</sup> , 607.4185<br>[M-H-Glc-Rha] <sup>-</sup> , 475.3782                                                                                                                                                                                                                                                    |

|                                   |       |                                             |                                                                                                                                                                                                                                              |
|-----------------------------------|-------|---------------------------------------------|----------------------------------------------------------------------------------------------------------------------------------------------------------------------------------------------------------------------------------------------|
|                                   |       |                                             | [M-H-Glc-Rha-Xyl/Ara] <sup>-</sup>                                                                                                                                                                                                           |
| S <sub>PG</sub> -22 <sup>m</sup>  | 11.63 | J/K/L [M-H-Ac-2Glc-Rha] <sup>-</sup>        | 945.5423 [M-H-Ac] <sup>-</sup> , 799.4847<br>[M-H-Ac-Rha] <sup>-</sup> , 637.4314<br>[M-H-Ac-Glc-Rha] <sup>-</sup> , 475.3783<br>[M-H-Ac-2Glc-Rha] <sup>-</sup>                                                                              |
| S <sub>PG</sub> -23 <sup>m</sup>  | 12.56 | J/K/L<br>[M-H-Glc-Rha-Xyl/Ara] <sup>-</sup> | 783.4884 [M-H-Xyl/Ara] <sup>-</sup> , 637.4296<br>[M-H-Rha-Xyl/Ara] <sup>-</sup> , 475.3782<br>[M-H-Glc-Rha-Xyl/Ara] <sup>-</sup>                                                                                                            |
| S <sub>PG</sub> -24 <sup>m</sup>  | 12.72 | P [M-H-4Glc] <sup>-</sup>                   | 963.5451 [M-H-4Glc] <sup>-</sup> , 801.4897<br>[M-H-2Glc] <sup>-</sup> , 639.4481 [M-H-3Glc] <sup>-</sup> ,<br>477.4033 [M-H-4Glc] <sup>-</sup>                                                                                              |
| S <sub>PG</sub> -25 <sup>m</sup>  | 13.09 | J/K/L [M-H-Ac-2Glc-Rha] <sup>-</sup>        | 945.5423 [M-H-Ac] <sup>-</sup> , 783.4827<br>[M-H-Ac-Glc] <sup>-</sup> , 637.4314<br>[M-H-Ac-Glc-Rha] <sup>-</sup> , 475.3783<br>[M-H-Ac-2Glc-Rha] <sup>-</sup> , 391.2837<br>[M-H-Ac-2Glc-Rha-C <sub>6</sub> H <sub>12</sub> ] <sup>-</sup> |
| S <sub>PG</sub> -26 <sup>m</sup>  | 13.56 | J/K/L [M-H-3Glc] <sup>-</sup>               | 799.4817 [M-H-Glc] <sup>-</sup> , 637.4340<br>[M-H-2Glc] <sup>-</sup> , 475.3737 [M-H-3Glc] <sup>-</sup>                                                                                                                                     |
| S <sub>PG</sub> -27 <sup>C</sup>  | 14    | M/N/O [M-H-Glc-Xyl] <sup>-</sup>            | 653.4175 [M-H-Xyl] <sup>-</sup> , 491.3735<br>[M-H-Glc-Xyl] <sup>-</sup>                                                                                                                                                                     |
| S <sub>PG</sub> -28 <sup>m</sup>  | 14.24 | Q [M-H-2Glc-Rha] <sup>-</sup>               | 801.5052 [M-H-Glc] <sup>-</sup> , 493.3945<br>[M-H-2Glc-Rha] <sup>-</sup>                                                                                                                                                                    |
| S <sub>PG</sub> -29 <sup>*C</sup> | 14.46 | L [M-H-2Glc] <sup>-</sup>                   | 637.4314 [M-H-Glc] <sup>-</sup> , 475.3783<br>[M-H-2Glc] <sup>-</sup> , 391.2837<br>[M-H-2Glc-C <sub>6</sub> H <sub>12</sub> ] <sup>-</sup>                                                                                                  |
| S <sub>PG</sub> -30 <sup>*C</sup> | 14.57 | O [M-H-Rha-Glc] <sup>-</sup>                | 653.4260 [M-H-Rha] <sup>-</sup> , 491.3739<br>[M-H-Rha-Glc] <sup>-</sup>                                                                                                                                                                     |
| S <sub>PG</sub> -31 <sup>C</sup>  | 15.24 | J/K/L [M-H-Xyl-Glc] <sup>-</sup>            | 637.4302 [M-H-Xyl] <sup>-</sup> , 475.3772<br>[M-H-Xyl-Glc] <sup>-</sup> , 391.2845<br>[M-H-Xyl-Glc-C <sub>6</sub> H <sub>12</sub> ] <sup>-</sup>                                                                                            |
| S <sub>PG</sub> -32 <sup>C</sup>  | 15.99 | J/K/L [M-H-Glc] <sup>-</sup>                | 475.3784 [M-H-Glc] <sup>-</sup> , 391.2850<br>[M-H-Glc-C <sub>6</sub> H <sub>12</sub> ] <sup>-</sup>                                                                                                                                         |
| S <sub>PG</sub> -33 <sup>*C</sup> | 16.08 | L [M-H-Rha-Glc] <sup>-</sup>                | 637.4318 [M-H-Rha] <sup>-</sup> , 475.3784<br>[M-H-Rha-Glc] <sup>-</sup> , 391.2850<br>[M-H-Rha-Glc-C <sub>6</sub> H <sub>12</sub> ] <sup>-</sup>                                                                                            |
| S <sub>PG</sub> -34 <sup>C</sup>  | 16.38 | J/K/L [M-H-Rha-Glc] <sup>-</sup>            | 637.4318 [M-H-Rha] <sup>-</sup> , 475.3784<br>[M-H-Rha-Glc] <sup>-</sup> , 391.2850<br>[M-H-Rha-Glc-C <sub>6</sub> H <sub>12</sub> ] <sup>-</sup>                                                                                            |
| S <sub>PG</sub> -35 <sup>C</sup>  | 16.5  | J/K/L [M-H-Glc] <sup>-</sup>                | 475.3784 [M-H-Glc] <sup>-</sup> , 391.2850<br>[M-H-Glc-C <sub>6</sub> H <sub>12</sub> ] <sup>-</sup>                                                                                                                                         |
| S <sub>PG</sub> -36 <sup>m</sup>  | 16.77 | G/H [M-H-2Xyl-3Glc] <sup>-</sup>            | 1077.5848 [M-H-Xyl] <sup>-</sup> , 945.5418<br>[M-H-2Xyl] <sup>-</sup> , 783.4890 [M-H-2Xyl-Glc] <sup>-</sup> ,<br>621.4382 [M-H-2Xyl-2Glc] <sup>-</sup> , 459.3821                                                                          |

|                                   |       |     |                                                                                                                                                                                                                                                                                                                                                                                                                      |
|-----------------------------------|-------|-----|----------------------------------------------------------------------------------------------------------------------------------------------------------------------------------------------------------------------------------------------------------------------------------------------------------------------------------------------------------------------------------------------------------------------|
|                                   |       |     | [M-H-2Xyl-3Glc] <sup>-</sup>                                                                                                                                                                                                                                                                                                                                                                                         |
| S <sub>PG</sub> -37* <sup>C</sup> | 16.97 | H   | [M-H-4Glc] <sup>-</sup>                                                                                                                                                                                                                                                                                                                                                                                              |
|                                   |       |     | 945.5386 [M-H-Glc] <sup>-</sup> , 783.4864 [M-H-2Glc] <sup>-</sup> , 621.4370 [M-H-3Glc] <sup>-</sup> , 459.3810 [M-H-4Glc] <sup>-</sup> , 1107.5953 [M-H-Ac] <sup>-</sup> , 1089.5863 [M-H-Ac-H <sub>2</sub> O] <sup>-</sup> , 945.5384 [M-H-Ac-Glc] <sup>-</sup> , 783.4899 [M-H-Ac-2Glc] <sup>-</sup> , 621.4239 [M-H-Ac-3Glc] <sup>-</sup> , 459.3872 [M-H-Ac-4Glc] <sup>-</sup>                                 |
| S <sub>PG</sub> -38 <sup>m</sup>  | 17.32 | G/H | [M-H-Ac-4Glc] <sup>-</sup>                                                                                                                                                                                                                                                                                                                                                                                           |
|                                   |       |     | 793.4382 [M-H-Glc] <sup>-</sup> , 631.3800 [M-H-2Glc] <sup>-</sup> , 455.3562 [M-H-2Glc-GlcA] <sup>-</sup>                                                                                                                                                                                                                                                                                                           |
| S <sub>PG</sub> -39* <sup>C</sup> | 17.51 | I   | [M-H-2Glc-GlcA] <sup>-</sup>                                                                                                                                                                                                                                                                                                                                                                                         |
|                                   |       |     | 945.5418 [M-H-Xyl] <sup>-</sup> , 783.4890 [M-H-Xyl-Glc] <sup>-</sup> , 621.4382 [M-H-Xyl-2Glc] <sup>-</sup> , 459.3821 [M-H-Xyl-3Glc] <sup>-</sup>                                                                                                                                                                                                                                                                  |
| S <sub>PG</sub> -40* <sup>C</sup> | 17.51 | H   | [M-H-Xyl-3Glc] <sup>-</sup>                                                                                                                                                                                                                                                                                                                                                                                          |
|                                   |       |     | 1077.5848 [M-H-Xyl] <sup>-</sup> , 945.5418 [M-H-2Xyl] <sup>-</sup> , 783.4890 [M-H-2Xyl-Glc] <sup>-</sup> , 621.4382 [M-H-2Xyl-2Glc] <sup>-</sup> , 459.3821 [M-H-2Xyl-3Glc] <sup>-</sup>                                                                                                                                                                                                                           |
| S <sub>PG</sub> -41 <sup>C</sup>  | 17.63 | G/H | [M-H-2Xyl-3Glc] <sup>-</sup>                                                                                                                                                                                                                                                                                                                                                                                         |
|                                   |       |     | 945.5452 [M-H-Ac-Xyl] <sup>-</sup> , 927.5374 [M-H-Ac-Xyl-H <sub>2</sub> O] <sup>-</sup> , 783.4885 [M-H-Ac-Xyl-Glc] <sup>-</sup> , 765.4813 [M-H-Ac-Xyl-Glc-H <sub>2</sub> O] <sup>-</sup> , 621.4388 [M-H-Ac-Xyl-2Glc] <sup>-</sup> , 603.4418 [M-H-Ac-Xyl-2Glc-H <sub>2</sub> O] <sup>-</sup> , 459.3835 [M-H-Ac-Xyl-3Glc] <sup>-</sup> , 375.2939 [M-H-Ac-Xyl-3Glc-C <sub>6</sub> H <sub>12</sub> ] <sup>-</sup> |
| S <sub>PG</sub> -42 <sup>C</sup>  | 17.88 | G/H | [M-H-Ac-Xyl-3Glc] <sup>-</sup>                                                                                                                                                                                                                                                                                                                                                                                       |
|                                   |       |     | 945.5418 [M-H-Xyl] <sup>-</sup> , 783.4890 [M-H-Xyl-Glc] <sup>-</sup> , 621.4382 [M-H-Xyl-2Glc] <sup>-</sup> , 459.3821 [M-H-Xyl-3Glc] <sup>-</sup>                                                                                                                                                                                                                                                                  |
| S <sub>PG</sub> -43* <sup>C</sup> | 18.09 | H   | [M-H-Xyl-3Glc] <sup>-</sup>                                                                                                                                                                                                                                                                                                                                                                                          |
|                                   |       |     | 945.5418 [M-H-Xyl] <sup>-</sup> , 783.4890 [M-H-Xyl-Glc] <sup>-</sup> , 621.4382 [M-H-Xyl-2Glc] <sup>-</sup> , 459.3821 [M-H-Xyl-3Glc] <sup>-</sup>                                                                                                                                                                                                                                                                  |
| S <sub>PG</sub> -44* <sup>C</sup> | 18.28 | H   | [M-H-Xyl-3Glc] <sup>-</sup>                                                                                                                                                                                                                                                                                                                                                                                          |
|                                   |       |     | 945.5452 [M-H-Ac-Xyl] <sup>-</sup> , 927.5374 [M-H-Ac-Xyl-H <sub>2</sub> O] <sup>-</sup> , 783.4885 [M-H-Ac-Xyl-Glc] <sup>-</sup> , 765.4813 [M-H-Ac-Xyl-Glc-H <sub>2</sub> O] <sup>-</sup> , 621.4388 [M-H-Ac-Xyl-2Glc] <sup>-</sup> , 603.4418 [M-H-Ac-Xyl-2Glc-H <sub>2</sub> O] <sup>-</sup> , 459.3835 [M-H-Ac-Xyl-3Glc] <sup>-</sup>                                                                           |
| S <sub>PG</sub> -45 <sup>C</sup>  | 18.37 | G/H | [M-H-Ac-Xyl-3Glc] <sup>-</sup>                                                                                                                                                                                                                                                                                                                                                                                       |
|                                   |       |     |                                                                                                                                                                                                                                                                                                                                                                                                                      |

|                                   |       |                                     |                                                                                                                                                                                                                                                                  |
|-----------------------------------|-------|-------------------------------------|------------------------------------------------------------------------------------------------------------------------------------------------------------------------------------------------------------------------------------------------------------------|
|                                   |       |                                     | [M-H-Ac-Xyl-3Glc] <sup>-</sup> , 375.2939<br>[M-H-Ac-Xyl-3Glc-C <sub>6</sub> H <sub>12</sub> ] <sup>-</sup>                                                                                                                                                      |
| S <sub>PG</sub> -46 <sup>C</sup>  | 18.74 | G/H [M-H-Ac-4Glc] <sup>-</sup>      | 1107.5953 [M-H-Ac] <sup>-</sup> , 1089.5863<br>[M-H-Ac-H <sub>2</sub> O] <sup>-</sup> , 945.5384<br>[M-H-Ac-Glc] <sup>-</sup> , 783.4899<br>[M-H-Ac-2Glc] <sup>-</sup> , 621.4239<br>[M-H-Ac-3Glc] <sup>-</sup> , 459.3872<br>[M-H-Ac-4Glc] <sup>-</sup>         |
| S <sub>PG</sub> -47 <sup>m</sup>  | 19.1  | I [M-H-Glc-GlcA] <sup>-</sup>       | 631.3884 [M-H-Glc] <sup>-</sup> , 455.3487<br>[M-H-Glc-GlcA] <sup>-</sup>                                                                                                                                                                                        |
| S <sub>PG</sub> -48* <sup>C</sup> | 19.23 | H [M-H-3Glc] <sup>-</sup>           | 783.4855 [M-H-Glc] <sup>-</sup> , 621.4365<br>[M-H-2Glc] <sup>-</sup> , 459.3878 [M-H-3Glc] <sup>-</sup> ,<br>375.2877 [M-H-3Glc-C <sub>6</sub> H <sub>12</sub> ] <sup>-</sup>                                                                                   |
| S <sub>PG</sub> -49 <sup>C</sup>  | 19.25 | G/H [M-H-Ac-Xyl-3Glc] <sup>-</sup>  | 945.5452 [M-H-Ac-Xyl] <sup>-</sup> , 927.5374<br>[M-H-Ac-Xyl-H <sub>2</sub> O] <sup>-</sup> , 783.4885<br>[M-H-Ac-Xyl-Glc] <sup>-</sup> , 765.4813<br>[M-H-Ac-Xyl-Glc-H <sub>2</sub> O] <sup>-</sup> , 663.4493                                                  |
| S <sub>PG</sub> -50 <sup>m</sup>  | 19.53 | G/H [M-H-Ac-3Glc] <sup>-</sup>      | [M-H-Xyl-2Glc] <sup>-</sup> , 621.4388<br>[M-H-Ac-Xyl-2Glc] <sup>-</sup> , 603.4418<br>[M-H-Ac-Xyl-2Glc-H <sub>2</sub> O] <sup>-</sup> , 459.3835<br>[M-H-Ac-Xyl-3Glc] <sup>-</sup> , 375.2939<br>[M-H-Ac-Xyl-3Glc-C <sub>6</sub> H <sub>12</sub> ] <sup>-</sup> |
| S <sub>PG</sub> -51 <sup>m</sup>  | 19.54 | G/H [M-H-Malonyl-3Glc] <sup>-</sup> | 783.4887 [M-H-Ac-Glc] <sup>-</sup> , 621.4347<br>[M-H-Ac-2Glc] <sup>-</sup> , 459.3852<br>[M-H-Ac-3Glc] <sup>-</sup>                                                                                                                                             |
| S <sub>PG</sub> -52* <sup>C</sup> | 19.54 | G/H [M-H-3Glc] <sup>-</sup>         | 945.5403 [M-H-Malonyl] <sup>-</sup> , 783.4855<br>[M-H-Malonyl-Glc] <sup>-</sup> , 621.4365                                                                                                                                                                      |
| S <sub>PG</sub> -53 <sup>m</sup>  | 19.73 | G/H [M-H-Ac-3Glc] <sup>-</sup>      | [M-H-Malonyl-2Glc] <sup>-</sup> , 459.3878<br>[M-H-Malonyl-3Glc] <sup>-</sup> , 375.2877<br>[M-H-Malonyl-3Glc-C <sub>6</sub> H <sub>12</sub> ] <sup>-</sup>                                                                                                      |
| S <sub>PG</sub> -54 <sup>C</sup>  | 19.77 | G/H [M-H-3Glc] <sup>-</sup>         | 783.4855 [M-H-Glc] <sup>-</sup> , 621.4365<br>[M-H-2Glc] <sup>-</sup> , 459.3878 [M-H-3Glc] <sup>-</sup> ,<br>375.2877 [M-H-3Glc-C <sub>6</sub> H <sub>12</sub> ] <sup>-</sup>                                                                                   |
| S <sub>PG</sub> -55 <sup>C</sup>  | 19.79 | G/H [M-H-Ac-Xyl-3Glc] <sup>-</sup>  | 783.621.4347 [M-H-Ac-Glc] <sup>-</sup> , 459.3852<br>[M-H-Ac-3Glc] <sup>-</sup>                                                                                                                                                                                  |
|                                   |       |                                     | 783.4855 [M-H-Glc] <sup>-</sup> , 621.4365<br>[M-H-2Glc] <sup>-</sup> , 459.3878 [M-H-3Glc] <sup>-</sup> ,<br>375.2877 [M-H-3Glc-C <sub>6</sub> H <sub>12</sub> ] <sup>-</sup>                                                                                   |
|                                   |       |                                     | 945.5452 [M-H-Ac-Xyl] <sup>-</sup> , 927.5374<br>[M-H-Ac-Xyl-H <sub>2</sub> O] <sup>-</sup> , 783.4885<br>[M-H-Ac-Xyl-Glc] <sup>-</sup> , 765.4813<br>[M-H-Ac-Xyl-Glc-H <sub>2</sub> O] <sup>-</sup> , 663.4493                                                  |



|                                   |       |                                  |                                                                                                                                  |
|-----------------------------------|-------|----------------------------------|----------------------------------------------------------------------------------------------------------------------------------|
|                                   |       |                                  | [M-H-Xyl-2Glc] <sup>-</sup> , 621.4388                                                                                           |
|                                   |       |                                  | [M-H-Ac-Xyl-2Glc] <sup>-</sup> , 603.4418                                                                                        |
|                                   |       |                                  | [M-H-Ac-Xyl-2Glc-H <sub>2</sub> O] <sup>-</sup> , 459.3835                                                                       |
|                                   |       |                                  | [M-H-Ac-Xyl-3Glc] <sup>-</sup> , 375.2939                                                                                        |
|                                   |       |                                  | [M-H-Ac-Xyl-3Glc-C <sub>6</sub> H <sub>12</sub> ] <sup>-</sup>                                                                   |
|                                   |       |                                  | 783.4855 [M-H-Glc] <sup>-</sup> , 621.4365                                                                                       |
| S <sub>PG</sub> -56 <sup>C</sup>  | 20.17 | G/H [M-H-3Glc] <sup>-</sup>      | [M-H-2Glc] <sup>-</sup> , 459.3878 [M-H-3Glc] <sup>-</sup> ,<br>375.2877 [M-H-3Glc-C <sub>6</sub> H <sub>12</sub> ] <sup>-</sup> |
|                                   |       |                                  | 783.4849 [M-H-Ac-Glc] <sup>-</sup> , 621.4347                                                                                    |
| S <sub>PG</sub> -57 <sup>C</sup>  | 20.35 | G/H [M-H-Ac-3Glc] <sup>-</sup>   | [M-H-Ac-2Glc] <sup>-</sup> , 459.3852                                                                                            |
|                                   |       |                                  | [M-H-Ac-3Glc] <sup>-</sup>                                                                                                       |
|                                   |       |                                  | 783.4897 [M-H-Xyl] <sup>-</sup> , 765.4748                                                                                       |
|                                   |       |                                  | [M-H-Xyl-H <sub>2</sub> O] <sup>-</sup> , 621.4368                                                                               |
| S <sub>PG</sub> -58 <sup>m</sup>  | 20.75 | G/H [M-H-Xyl-2Glc] <sup>-</sup>  | [M-H-Xyl-Glc] <sup>-</sup> , 459.3809                                                                                            |
|                                   |       |                                  | [M-H-Xyl-2Glc] <sup>-</sup> , 375.2876                                                                                           |
|                                   |       |                                  | [M-H-Xyl-2Glc-C <sub>6</sub> H <sub>12</sub> ] <sup>-</sup>                                                                      |
|                                   |       |                                  | 783.621.4347 [M-H-Ac-Glc] <sup>-</sup> , 459.3852                                                                                |
| S <sub>PG</sub> -59 <sup>C</sup>  | 21.19 | G/H [M-H-Ac-3Glc] <sup>-</sup>   | [M-H-Ac-3Glc] <sup>-</sup>                                                                                                       |
|                                   |       |                                  | 619.4210 [M-H-Xyl] <sup>-</sup> , 457.3684                                                                                       |
| S <sub>PG</sub> -60 <sup>m</sup>  | 21.25 | D/E/F [M-H-Xyl-Glc] <sup>-</sup> | [M-H-Xyl-Glc] <sup>-</sup>                                                                                                       |
|                                   |       |                                  | 619.4210 [M-H-Xyl] <sup>-</sup> , 457.3684                                                                                       |
| S <sub>PG</sub> -61 <sup>m</sup>  | 21.75 | D/E/F [M-H-Xyl-Glc] <sup>-</sup> | [M-H-Xyl-Glc] <sup>-</sup>                                                                                                       |
|                                   |       |                                  | 619.4276 [M-H-Rha] <sup>-</sup> , 457.3452                                                                                       |
| S <sub>PG</sub> -62* <sup>C</sup> | 21.79 | F [M-H-Rha-Glc] <sup>-</sup>     | [M-H-Rha-Glc] <sup>-</sup>                                                                                                       |
|                                   |       |                                  | 619.4276 [M-H-Rha] <sup>-</sup> , 457.3452                                                                                       |
| S <sub>PG</sub> -63* <sup>C</sup> | 22.27 | E [M-H-Rha-Glc] <sup>-</sup>     | [M-H-Rha-Glc] <sup>-</sup>                                                                                                       |
|                                   |       |                                  | 621.4338 [M-H-Glc] <sup>-</sup> , 459.3880                                                                                       |
| S <sub>PG</sub> -64 <sup>C</sup>  | 23.04 | G/H [M-H-2Glc] <sup>-</sup>      | [M-H-2Glc] <sup>-</sup>                                                                                                          |
|                                   |       |                                  | 631.3884 [M-H-Glc] <sup>-</sup> , 455.3487                                                                                       |
| S <sub>PG</sub> -65 <sup>m</sup>  | 23.5  | I [M-H-Glc-GlcA] <sup>-</sup>    | [M-H-Glc-GlcA] <sup>-</sup>                                                                                                      |
|                                   |       |                                  | 621.4338 [M-H-Glc] <sup>-</sup> , 459.3880                                                                                       |
| S <sub>PG</sub> -66* <sup>C</sup> | 24.4  | H [M-H-2Glc] <sup>-</sup>        | [M-H-2Glc] <sup>-</sup>                                                                                                          |
|                                   |       |                                  | 621.4338 [M-H-Glc] <sup>-</sup> , 459.3880                                                                                       |
| S <sub>PG</sub> -67 <sup>C</sup>  | 24.72 | G/H [M-H-2Glc] <sup>-</sup>      | [M-H-2Glc] <sup>-</sup>                                                                                                          |
|                                   |       |                                  | 603.3776 [M-H-Glc] <sup>-</sup> , 441.3452                                                                                       |
| S <sub>PG</sub> -68* <sup>C</sup> | 27.55 | C [M-H-2Glc] <sup>-</sup>        | [M-H-2Glc] <sup>-</sup>                                                                                                          |
|                                   |       |                                  | 603.3776 [M-H-Glc] <sup>-</sup> , 441.3452                                                                                       |
| S <sub>PG</sub> -69* <sup>C</sup> | 27.88 | A [M-H-2Glc] <sup>-</sup>        | [M-H-2Glc] <sup>-</sup>                                                                                                          |
|                                   |       |                                  | 765.4600 [M-H-Ac] <sup>-</sup> , 603.3768                                                                                        |
| S <sub>PG</sub> -70 <sup>m</sup>  | 28    | A/B/C [M-H-Ac-2Glc] <sup>-</sup> | [M-H-Ac-Glc] <sup>-</sup> , 441.2103                                                                                             |
|                                   |       |                                  | [M-H-Ac-2Glc] <sup>-</sup>                                                                                                       |
| S <sub>PG</sub> -71 <sup>m</sup>  | 28.2  | G/H [M-H-Glc] <sup>-</sup>       | 459.3880 [M-H-Glc] <sup>-</sup>                                                                                                  |
| S <sub>PG</sub> -72 <sup>m</sup>  | 28.41 | G/H [M-H-Glc] <sup>-</sup>       | 459.3880 [M-H-Glc] <sup>-</sup>                                                                                                  |
| S <sub>PG</sub> -73 <sup>m</sup>  | 29.57 | A/B/C [M-H-Ac-2Glc] <sup>-</sup> | 765.4600 [M-H-Ac] <sup>-</sup> , 603.3768                                                                                        |

|                                   |       |                                    |                                                                                                        |
|-----------------------------------|-------|------------------------------------|--------------------------------------------------------------------------------------------------------|
|                                   |       |                                    | [M-H-Ac-Glc] <sup>-</sup> , 441.2103                                                                   |
|                                   |       |                                    | [M-H-Ac-2Glc] <sup>-</sup>                                                                             |
|                                   |       |                                    | 433.1382 [M-H-Glc] <sup>-</sup> , 271.0624                                                             |
| F <sub>AM</sub> -8 <sup>m</sup>   | 6.4   | FA-2 [M-H-2Glc] <sup>-</sup>       | [M-H-2Glc] <sup>-</sup> , 151.0033                                                                     |
|                                   |       |                                    | [M-H-2Glc-C <sub>8</sub> H <sub>8</sub> O] <sup>-</sup> , 119.0527                                     |
|                                   |       |                                    | [M-H-2Glc-C <sub>7</sub> H <sub>4</sub> O <sub>4</sub> ] <sup>-</sup>                                  |
| F <sub>AM</sub> -13 <sup>C</sup>  | 7.46  | FA-10 [M-H-Glc] <sup>-</sup>       | 299.0550 [M-H-Glc] <sup>-</sup> , 284.0317                                                             |
|                                   |       |                                    | [M-H-Glc] <sup>-</sup> , 135.0079 [M-H-Glc-C <sub>9</sub> H <sub>8</sub> O <sub>3</sub> ] <sup>-</sup> |
| F <sub>AM</sub> -36 <sup>m</sup>  | 10    | FA-12 [M-H-Api-Glc] <sup>-</sup>   | 463.1601 [M-H-Api] <sup>-</sup> , 301.0707                                                             |
|                                   |       |                                    | [M-H-Api-Glc] <sup>-</sup>                                                                             |
| F <sub>AM</sub> -38 <sup>m</sup>  | 10.82 | FA-5 [M-H-Glc] <sup>-</sup>        | 269.0446 [M-H-Glc] <sup>-</sup>                                                                        |
|                                   |       |                                    | 299.0550 [M-H-Glc] <sup>-</sup> , 284.0317                                                             |
| F <sub>AM</sub> -40 <sup>m</sup>  | 11.21 | FA-10 [M-H-Glc] <sup>-</sup>       | [M-H-Glc-CH <sub>3</sub> ] <sup>-</sup> , 135.0079                                                     |
|                                   |       |                                    | [M-H-Glc-CH <sub>3</sub> -C <sub>8</sub> H <sub>5</sub> O <sub>3</sub> ] <sup>-</sup>                  |
| F <sub>AM</sub> -41 <sup>m</sup>  | 11.25 | FA-7 [M-H-Glc] <sup>-</sup>        | 283.0610 [M-H-Glc] <sup>-</sup> , 268.0359                                                             |
|                                   |       |                                    | [M-H-Glc-CH <sub>3</sub> ] <sup>-</sup>                                                                |
|                                   |       |                                    | 463.1591 [M-H-Glc] <sup>-</sup> , 301.0704                                                             |
| F <sub>AM</sub> -43 <sup>m</sup>  | 11.44 | FA-12 [M-H-2Glc] <sup>-</sup>      | [M-H-2Glc] <sup>-</sup> , 271.0627                                                                     |
|                                   |       |                                    | [M-H-2Glc-2CH <sub>3</sub> ] <sup>-</sup>                                                              |
| F <sub>AM</sub> -47 <sup>m</sup>  | 11.6  | FA-8 [M-H-Glc] <sup>-</sup>        | 285.0752 [M-H-Glc] <sup>-</sup>                                                                        |
| F <sub>AM</sub> -49 <sup>m</sup>  | 12.1  | FA-12 [M-H-Glc] <sup>-</sup>       | 301.1099 [M-H-Glc] <sup>-</sup> , 271.0624                                                             |
|                                   |       |                                    | [M-H-Glc-2CH <sub>3</sub> ] <sup>-</sup>                                                               |
|                                   |       |                                    | 403.1396 [M-H-CH <sub>2</sub> O] <sup>-</sup> , 373.1224                                               |
| F <sub>AM</sub> -50 <sup>m</sup>  | 12.28 | FA-12 [M-H-Api] <sup>-</sup>       | [M-H-2CH <sub>2</sub> O] <sup>-</sup> , 301.1099 [M-H-Api] <sup>-</sup> ,                              |
|                                   |       |                                    | 283.0561 [M-H-Api-H <sub>2</sub> O] <sup>-</sup>                                                       |
| F <sub>AM</sub> -54 <sup>m</sup>  | 12.8  | FA-3 [M-H] <sup>-</sup>            | 135.0085 [M-H-C <sub>8</sub> H <sub>6</sub> O] <sup>-</sup>                                            |
| F <sub>AM</sub> -60 <sup>m</sup>  | 13.3  | FA-12 [M-H-Glc] <sup>-</sup>       | 301.1099 [M-H-Glc] <sup>-</sup> , 271.0624                                                             |
|                                   |       |                                    | [M-H-Glc-CH <sub>3</sub> ] <sup>-</sup>                                                                |
| F <sub>AM</sub> -62 <sup>m</sup>  | 13.6  | FA-7 [M-H] <sup>-</sup>            | 283.0607 [M-H] <sup>-</sup> , 268.0450 [M-H-CH <sub>3</sub> ] <sup>-</sup>                             |
| F <sub>AM</sub> -64 <sup>*m</sup> | 13.7  | FA-3 [M-H] <sup>-</sup>            | 135.0085 [M-H-C <sub>8</sub> H <sub>6</sub> O] <sup>-</sup>                                            |
|                                   |       |                                    | 267.1 [M-H-Acetyl-Glc] <sup>-</sup> , 252.0420                                                         |
| F <sub>AM</sub> -67 <sup>m</sup>  | 13.91 | FA-4 [M-H-Acetyl-Glc] <sup>-</sup> | [M-H-Acetyl-Glc-CH <sub>3</sub> ] <sup>-</sup> , 135.0101                                              |
|                                   |       |                                    | [M-H-Acetyl-Glc-CH <sub>3</sub> -C <sub>8</sub> H <sub>5</sub> O] <sup>-</sup>                         |
| F <sub>AM</sub> -68 <sup>m</sup>  | 14.2  | FA-7 [M-H] <sup>-</sup>            | 268.0450 [M-H-CH <sub>3</sub> ] <sup>-</sup>                                                           |
|                                   |       |                                    | 255.0657 [M-H-2Glc] <sup>-</sup> , 135.0081                                                            |
| F <sub>AM</sub> -69 <sup>m</sup>  | 14.22 | FA-1 [M-H-2Glc] <sup>-</sup>       | [M-H-2Glc-C <sub>8</sub> H <sub>8</sub> O] <sup>-</sup> , 119.0495                                     |
|                                   |       |                                    | [M-H-2Glc-C <sub>7</sub> H <sub>4</sub> O <sub>3</sub> ] <sup>-</sup>                                  |
|                                   |       |                                    | 299.0897 [M-H-Api-Glc] <sup>-</sup> , 284.0686                                                         |
| F <sub>AM</sub> -70 <sup>m</sup>  | 14.23 | FA-11 [M-H-Api-Glc] <sup>-</sup>   | [M-H-Api-Glc-CH <sub>3</sub> ] <sup>-</sup> , 269.0417                                                 |
|                                   |       |                                    | [M-H-Api-Glc-2CH <sub>3</sub> ] <sup>-</sup>                                                           |
|                                   |       |                                    | 299.0897 [M-H-Api-Glc] <sup>-</sup> , 284.0686                                                         |
| F <sub>AM</sub> -71 <sup>m</sup>  | 14.47 | FA-11 [M-H-Api-Glc] <sup>-</sup>   | [M-H-Api-Glc-CH <sub>3</sub> ] <sup>-</sup> , 269.0417                                                 |
|                                   |       |                                    | [M-H-Api-Glc-2CH <sub>3</sub> ] <sup>-</sup>                                                           |
| F <sub>AM</sub> -72 <sup>C</sup>  | 15.07 | FA-12 [M-H-Glc] <sup>-</sup>       | 301.1099 [M-H-Glc] <sup>-</sup> , 271.0624                                                             |

|                                      |       |                                                                                  |                                                                                                                                                                                                                                                                                                                                                                                                                                                                                                        |
|--------------------------------------|-------|----------------------------------------------------------------------------------|--------------------------------------------------------------------------------------------------------------------------------------------------------------------------------------------------------------------------------------------------------------------------------------------------------------------------------------------------------------------------------------------------------------------------------------------------------------------------------------------------------|
|                                      |       |                                                                                  | [M-H-Glc-2CH <sub>3</sub> ] <sup>-</sup>                                                                                                                                                                                                                                                                                                                                                                                                                                                               |
| F <sub>AM</sub> -75* <sup>C</sup>    | 15.22 | FA-7 [M-H] <sup>-</sup>                                                          | 135.0081 [M-H-C <sub>8</sub> H <sub>8</sub> O] <sup>-</sup> , 119.0495<br>[M-H-C <sub>7</sub> H <sub>4</sub> O <sub>3</sub> ] <sup>-</sup>                                                                                                                                                                                                                                                                                                                                                             |
| F <sub>AM</sub> -76* <sup>C</sup>    | 15.7  | FA-12 [M-H-Glc] <sup>-</sup>                                                     | 301.1099 [M-H-Glc] <sup>-</sup> , 271.0624<br>[M-H-Glc-2CH <sub>3</sub> ] <sup>-</sup>                                                                                                                                                                                                                                                                                                                                                                                                                 |
| F <sub>AM</sub> -77 <sup>m</sup>     | 17.87 | FA-5 [M-H] <sup>-</sup>                                                          | 133.0286 [M-H-C <sub>7</sub> H <sub>3</sub> O <sub>3</sub> ] <sup>-</sup>                                                                                                                                                                                                                                                                                                                                                                                                                              |
| F <sub>AM</sub> -78 <sup>m</sup>     | 18.3  | FA-10 [M-H] <sup>-</sup>                                                         | 284.0305 [M-H-CH <sub>3</sub> ] <sup>-</sup> , 269.0441<br>[M-H-2CH <sub>3</sub> ] <sup>-</sup>                                                                                                                                                                                                                                                                                                                                                                                                        |
| F <sub>AM</sub> -79 <sup>m</sup>     | 18.9  | FA-11 [M-H] <sup>-</sup>                                                         | 284.0682 [M-H-CH <sub>3</sub> ] <sup>-</sup> , 269.0434<br>[M-H-2CH <sub>3</sub> ] <sup>-</sup>                                                                                                                                                                                                                                                                                                                                                                                                        |
| F <sub>AM</sub> -80 <sup>m</sup>     | 19.01 | FA-11 [M-H] <sup>-</sup>                                                         | 284.0682 [M-H-CH <sub>3</sub> ] <sup>-</sup> , 269.0434<br>[M-H-2CH <sub>3</sub> ] <sup>-</sup>                                                                                                                                                                                                                                                                                                                                                                                                        |
| F <sub>AM</sub> -81 <sup>C</sup>     | 19.09 | FA-3 [M-H] <sup>-</sup>                                                          | 135.0085 [M-H-C <sub>8</sub> H <sub>6</sub> O] <sup>-</sup>                                                                                                                                                                                                                                                                                                                                                                                                                                            |
| F <sub>AM</sub> -82* <sup>C</sup>    | 20.25 | FA-4 [M-H] <sup>-</sup>                                                          | 252.0419 [M-H-CH <sub>3</sub> ] <sup>-</sup>                                                                                                                                                                                                                                                                                                                                                                                                                                                           |
| F <sub>CC</sub> -3 <sup>C</sup>      | 4.97  | FA-9 [M-H] <sup>-</sup>                                                          | 137.0238 [M-H-C <sub>8</sub> H <sub>8</sub> O <sub>3</sub> ] <sup>-</sup> , 109.0296<br>[M-H-C <sub>9</sub> H <sub>8</sub> O <sub>4</sub> ] <sup>-</sup>                                                                                                                                                                                                                                                                                                                                               |
| F <sub>CC</sub> -9 <sup>C</sup>      | 6.65  | FA-9 [M-H] <sup>-</sup>                                                          | 137.0238 [M-H-C <sub>8</sub> H <sub>8</sub> O <sub>3</sub> ] <sup>-</sup> , 109.0296<br>[M-H-C <sub>9</sub> H <sub>8</sub> O <sub>4</sub> ] <sup>-</sup>                                                                                                                                                                                                                                                                                                                                               |
| F <sub>CC</sub> -11 <sup>m</sup>     | 6.69  | FA-9 [M-H] <sup>-</sup>                                                          | 137.0238 [M-H-C <sub>8</sub> H <sub>8</sub> O <sub>3</sub> ] <sup>-</sup> , 109.0296<br>[M-H-C <sub>9</sub> H <sub>8</sub> O <sub>4</sub> ] <sup>-</sup>                                                                                                                                                                                                                                                                                                                                               |
| F <sub>GU,AM</sub> -25* <sup>C</sup> | 8.95  | FA-7 [M-H-Glc] <sup>-</sup>                                                      | 283.0607 [M-H-Glc] <sup>-</sup> , 268.0450<br>[M-H-Glc-CH <sub>3</sub> ] <sup>-</sup>                                                                                                                                                                                                                                                                                                                                                                                                                  |
| F <sub>GU,AM</sub> -51 <sup>m</sup>  | 12.3  | FA-4 [M-H-Api-Glc] <sup>-</sup>                                                  | 267.0661 [M-H-Api-Glc] <sup>-</sup> , 252.0420<br>[M-H-Api-Glc-CH <sub>3</sub> ] <sup>-</sup> , 135.0101<br>[M-H-Api-Glc-CH <sub>3</sub> -C <sub>8</sub> H <sub>5</sub> O] <sup>-</sup>                                                                                                                                                                                                                                                                                                                |
| F <sub>GU,AM</sub> -55 <sup>m</sup>  | 13    | FA-4 [M-H-Api-Glc] <sup>-</sup>                                                  | 267.0661 [M-H-Api-Glc] <sup>-</sup> , 252.0420<br>[M-H-Api-Glc-CH <sub>3</sub> ] <sup>-</sup> , 135.0101<br>[M-H-Api-Glc-CH <sub>3</sub> -C <sub>8</sub> H <sub>5</sub> O] <sup>-</sup>                                                                                                                                                                                                                                                                                                                |
| F <sub>GU</sub> -2 <sup>m</sup>      | 3.95  | FA-1 [M-H-C <sub>4</sub> H <sub>2</sub> O <sub>2</sub> -2Glc] <sup>-</sup>       | 579.1732 [M-H-C <sub>4</sub> H <sub>2</sub> O <sub>2</sub> ] <sup>-</sup> , 417.1187<br>[M-H-C <sub>4</sub> H <sub>2</sub> O <sub>2</sub> -Glc] <sup>-</sup> , 255.0657<br>[M-H-C <sub>4</sub> H <sub>2</sub> O <sub>2</sub> -2Glc] <sup>-</sup> , 135.0081<br>[M-H-C <sub>4</sub> H <sub>2</sub> O <sub>2</sub> -2Glc-C <sub>8</sub> H <sub>8</sub> O] <sup>-</sup> , 119.0495<br>[M-H-C <sub>4</sub> H <sub>2</sub> O <sub>2</sub> -2Glc-C <sub>7</sub> H <sub>4</sub> O <sub>3</sub> ] <sup>-</sup> |
| F <sub>GU</sub> -4 <sup>m</sup>      | 5.7   | FA-1 [M-H-C <sub>4</sub> H <sub>2</sub> O <sub>2</sub> -Glc] <sup>-</sup>        | 417.1187 [M-H-C <sub>4</sub> H <sub>2</sub> O <sub>2</sub> ] <sup>-</sup> , 255.0657<br>[M-H-C <sub>4</sub> H <sub>2</sub> O <sub>2</sub> -Glc] <sup>-</sup> , 135.0081<br>[M-H-C <sub>4</sub> H <sub>2</sub> O <sub>2</sub> -Glc-C <sub>8</sub> H <sub>8</sub> O] <sup>-</sup> , 119.0495<br>[M-H-C <sub>4</sub> H <sub>2</sub> O <sub>2</sub> -Glc-C <sub>7</sub> H <sub>4</sub> O <sub>3</sub> ] <sup>-</sup>                                                                                       |
| F <sub>GU</sub> -5 <sup>m</sup>      | 5.87  | FA-1 [M-H-C <sub>4</sub> H <sub>2</sub> O <sub>2</sub> -Glc] <sup>-</sup>        | 417.1187 [M-H-C <sub>4</sub> H <sub>2</sub> O <sub>2</sub> ] <sup>-</sup> , 255.0657<br>[M-H-C <sub>4</sub> H <sub>2</sub> O <sub>2</sub> -Glc] <sup>-</sup> , 135.0081<br>[M-H-C <sub>4</sub> H <sub>2</sub> O <sub>2</sub> -Glc-C <sub>8</sub> H <sub>8</sub> O] <sup>-</sup> , 119.0495<br>[M-H-C <sub>4</sub> H <sub>2</sub> O <sub>2</sub> -Glc-C <sub>7</sub> H <sub>4</sub> O <sub>3</sub> ] <sup>-</sup>                                                                                       |
| F <sub>GU</sub> -6 <sup>m</sup>      | 5.88  | FA-1<br>[M-H-C <sub>4</sub> H <sub>2</sub> O <sub>2</sub> -Api-Glc] <sup>-</sup> | 549.1642 [M-H-C <sub>4</sub> H <sub>2</sub> O <sub>2</sub> ] <sup>-</sup> , 417.1187<br>[M-H-C <sub>4</sub> H <sub>2</sub> O <sub>2</sub> -Api] <sup>-</sup> , 255.0657<br>[M-H-C <sub>4</sub> H <sub>2</sub> O <sub>2</sub> -Api-Glc] <sup>-</sup> , 135.0081                                                                                                                                                                                                                                         |

|                     |      |                                  |                                                                                                                                                                                                                                                                                       |
|---------------------|------|----------------------------------|---------------------------------------------------------------------------------------------------------------------------------------------------------------------------------------------------------------------------------------------------------------------------------------|
|                     |      |                                  | [M-H-C <sub>4</sub> H <sub>2</sub> O <sub>2</sub> -Api-Glc-C <sub>8</sub> H <sub>8</sub> O] <sup>-</sup> ,<br>119.0495                                                                                                                                                                |
|                     |      |                                  | [M-H-C <sub>4</sub> H <sub>2</sub> O <sub>2</sub> -Api-Glc-C <sub>7</sub> H <sub>4</sub> O <sub>3</sub> ] <sup>-</sup><br>417.1187 [M-H-Glc] <sup>-</sup> , 255.0657                                                                                                                  |
| FGU-7 <sup>C</sup>  | 6.18 | FA-1 [M-H-2Glc] <sup>-</sup>     | [M-H-2Glc] <sup>-</sup> , 135.0081<br>[M-H-2Glc-C <sub>8</sub> H <sub>8</sub> O] <sup>-</sup> , 119.0495<br>[M-H-2Glc-C <sub>7</sub> H <sub>4</sub> O <sub>3</sub> ] <sup>-</sup><br>549.1641 [M-H-Glc] <sup>-</sup> , 417.1187                                                       |
|                     |      |                                  | [M-H-Api-Glc] <sup>-</sup> , 255.0657                                                                                                                                                                                                                                                 |
| FGU-10 <sup>m</sup> | 6.65 | FA-1 [M-H-Api-2Glc] <sup>-</sup> | [M-H-Api-2Glc] <sup>-</sup> , 135.0081<br>[M-H-Api-2Glc-C <sub>8</sub> H <sub>8</sub> O] <sup>-</sup> , 119.0495<br>[M-H-Api-2Glc-C <sub>7</sub> H <sub>4</sub> O <sub>3</sub> ] <sup>-</sup><br>473.1127 [M-H-C <sub>4</sub> H <sub>8</sub> O <sub>4</sub> ] <sup>-</sup> , 383.0768 |
|                     |      |                                  | [M-H-C <sub>4</sub> H <sub>8</sub> O <sub>4</sub> -C <sub>3</sub> H <sub>6</sub> O <sub>3</sub> ] <sup>-</sup> , 353.0674                                                                                                                                                             |
| FGU-12 <sup>C</sup> | 7.21 | FA-5 [M-H-2Glc] <sup>-</sup>     | [M-H-2C <sub>4</sub> H <sub>8</sub> O <sub>4</sub> ] <sup>-</sup> , 325.0608<br>[M-H-2C <sub>4</sub> H <sub>8</sub> O <sub>4</sub> -CO] <sup>-</sup><br>253.0512 [M-H-Glc] <sup>-</sup> , 135.0110                                                                                    |
|                     |      |                                  | [M-H-Glc-C <sub>8</sub> H <sub>6</sub> O] <sup>-</sup><br>433.1127 [M-H-Glc] <sup>-</sup> , 271.0624                                                                                                                                                                                  |
| FGU-14 <sup>m</sup> | 7.66 | FA-3 [M-H-Glc] <sup>-</sup>      | [M-H-2Glc] <sup>-</sup> , 151.0033<br>[M-H-2Glc-C <sub>8</sub> H <sub>8</sub> O] <sup>-</sup> , 119.0527<br>[M-H-2Glc-C <sub>7</sub> H <sub>4</sub> O <sub>4</sub> ] <sup>-</sup><br>503.1192 [M-H-C <sub>2</sub> H <sub>4</sub> O <sub>2</sub> ] <sup>-</sup> , 443.098              |
|                     |      |                                  | [M-H-C <sub>4</sub> H <sub>8</sub> O <sub>4</sub> ] <sup>-</sup> , 353.0674                                                                                                                                                                                                           |
| FGU-15 <sup>m</sup> | 7.7  | FA-2 [M-H-2Glc] <sup>-</sup>     | [M-H-C <sub>4</sub> H <sub>8</sub> O <sub>4</sub> -C <sub>3</sub> H <sub>6</sub> O <sub>3</sub> ] <sup>-</sup><br>255.0657 [M-H-2Glc] <sup>-</sup> , 135.0081                                                                                                                         |
|                     |      |                                  | [M-H-2Glc-C <sub>8</sub> H <sub>8</sub> O] <sup>-</sup> , 119.0495                                                                                                                                                                                                                    |
| FGU-16 <sup>C</sup> | 8.1  | FA-5 [M-H-Glc-Api] <sup>-</sup>  | [M-H-2Glc-C <sub>7</sub> H <sub>4</sub> O <sub>3</sub> ] <sup>-</sup><br>549.1609 [M-H-Glc] <sup>-</sup> , 417.1187<br>[M-H-Api-Glc] <sup>-</sup> , 255.0657                                                                                                                          |
|                     |      |                                  | [M-H-Api-2Glc] <sup>-</sup> , 135.0081                                                                                                                                                                                                                                                |
| FGU-17 <sup>C</sup> | 8.2  | FA-1 [M-H-2Glc] <sup>-</sup>     | [M-H-Api-2Glc-C <sub>8</sub> H <sub>8</sub> O] <sup>-</sup> , 119.0495<br>[M-H-Api-2Glc-C <sub>7</sub> H <sub>4</sub> O <sub>3</sub> ] <sup>-</sup><br>253.0512 [M-H-Glc] <sup>-</sup> , 135.0110                                                                                     |
|                     |      |                                  | [M-H-Glc-C <sub>8</sub> H <sub>6</sub> O] <sup>-</sup><br>415.1027 [M-H-Api] <sup>-</sup> , 253.0512                                                                                                                                                                                  |
| FGU-18 <sup>m</sup> | 8.34 | FA-1 [M-H-Api-2Glc] <sup>-</sup> | [M-H-Glc-Api] <sup>-</sup> , 135.0110<br>[M-H-Glc-Api-C <sub>8</sub> H <sub>6</sub> O] <sup>-</sup><br>549.1609 [M-H-Glc] <sup>-</sup> , 417.1187                                                                                                                                     |
|                     |      |                                  | [M-H-Api-Glc] <sup>-</sup> , 255.0657                                                                                                                                                                                                                                                 |
| FGU-19 <sup>m</sup> | 8.41 | FA-3 [M-H-Glc] <sup>-</sup>      | [M-H-Api-2Glc] <sup>-</sup> , 135.0081                                                                                                                                                                                                                                                |
|                     |      |                                  | [M-H-Api-2Glc-C <sub>8</sub> H <sub>8</sub> O] <sup>-</sup> , 119.0495                                                                                                                                                                                                                |
| FGU-20 <sup>m</sup> | 8.42 | FA-3 [M-H-Glc-Api] <sup>-</sup>  | [M-H-Api-2Glc-C <sub>7</sub> H <sub>4</sub> O <sub>3</sub> ] <sup>-</sup><br>253.0512 [M-H-Glc] <sup>-</sup> , 135.0110<br>[M-H-Glc-Api-C <sub>8</sub> H <sub>6</sub> O] <sup>-</sup><br>549.1609 [M-H-Glc] <sup>-</sup> , 417.1187                                                   |
|                     |      |                                  | [M-H-Api-Glc] <sup>-</sup> , 255.0657                                                                                                                                                                                                                                                 |
| FGU-21 <sup>m</sup> | 8.64 | FA-1 [M-H-Api-2Glc] <sup>-</sup> | [M-H-Api-2Glc] <sup>-</sup> , 135.0081<br>[M-H-Api-2Glc-C <sub>8</sub> H <sub>8</sub> O] <sup>-</sup> , 119.0495<br>[M-H-Api-2Glc-C <sub>7</sub> H <sub>4</sub> O <sub>3</sub> ] <sup>-</sup>                                                                                         |

|                                   |       |                                 |                                                                                                                                                                                                                                                                                                                                                                          |
|-----------------------------------|-------|---------------------------------|--------------------------------------------------------------------------------------------------------------------------------------------------------------------------------------------------------------------------------------------------------------------------------------------------------------------------------------------------------------------------|
| F <sub>GU</sub> -22 <sup>m</sup>  | 8.75  | FA-3 [M-H-Glc-Api] <sup>-</sup> | 415.1027 [M-H-Api] <sup>-</sup> , 253.0512<br>[M-H-Glc-Api] <sup>-</sup> , 135.0110<br>[M-H-Glc-Api-C <sub>8</sub> H <sub>6</sub> O] <sup>-</sup>                                                                                                                                                                                                                        |
| F <sub>GU</sub> -23 <sup>C</sup>  | 8.75  | FA-2 [M-H-Glc] <sup>-</sup>     | 271.0606 [M-H-Glc] <sup>-</sup><br>255.0657 [M-H-2Glc] <sup>-</sup> , 135.0081                                                                                                                                                                                                                                                                                           |
| F <sub>GU</sub> -24 <sup>C</sup>  | 8.82  | FA-1 [M-H-2Glc] <sup>-</sup>    | [M-H-2Glc-C <sub>8</sub> H <sub>8</sub> O] <sup>-</sup> , 119.0495<br>[M-H-2Glc-C <sub>7</sub> H <sub>4</sub> O <sub>3</sub> ] <sup>-</sup>                                                                                                                                                                                                                              |
| F <sub>GU</sub> -26 <sup>C</sup>  | 8.96  | FA-1 [M-H-Glc] <sup>-</sup>     | 255.0668 [M-H-Glc] <sup>-</sup> , 135.0092<br>[M-H-Glc-C <sub>8</sub> H <sub>8</sub> O] <sup>-</sup><br>417.1216 [M-H-2Glc] <sup>-</sup> , 255.0657                                                                                                                                                                                                                      |
| F <sub>GU</sub> -27 <sup>C</sup>  | 9     | FA-1 [M-H-2Glc] <sup>-</sup>    | [M-H-2Glc] <sup>-</sup> , 135.0081<br>[M-H-2Glc-C <sub>8</sub> H <sub>8</sub> O] <sup>-</sup> , 119.0495<br>[M-H-2Glc-C <sub>7</sub> H <sub>4</sub> O <sub>3</sub> ] <sup>-</sup>                                                                                                                                                                                        |
| F <sub>GU</sub> -28 <sup>m</sup>  | 9.01  | FA-2 [M-H-Glc] <sup>-</sup>     | 271.0624 [M-H-Glc] <sup>-</sup> , 151.0033<br>[M-H-Glc-C <sub>8</sub> H <sub>8</sub> O] <sup>-</sup> , 119.0527<br>[M-H-Glc-C <sub>7</sub> H <sub>4</sub> O <sub>4</sub> ] <sup>-</sup><br>417.1216 [M-H-Api-Glc] <sup>-</sup> , 255.0657                                                                                                                                |
| F <sub>GU</sub> -29 <sup>C</sup>  | 9.02  | FA-1 [M-H-Api-Glc] <sup>-</sup> | [M-H-Api-Glc] <sup>-</sup> , 135.0081<br>[M-H-Api-Glc-C <sub>8</sub> H <sub>8</sub> O] <sup>-</sup> , 119.0495<br>[M-H-Api-Glc-C <sub>7</sub> H <sub>4</sub> O <sub>3</sub> ] <sup>-</sup>                                                                                                                                                                               |
| F <sub>GU</sub> -30 <sup>*C</sup> | 9.11  | FA-1 [M-H-Glc] <sup>-</sup>     | 255.0657 [M-H-Glc] <sup>-</sup> , 135.0081<br>[M-H-Glc-C <sub>8</sub> H <sub>8</sub> O] <sup>-</sup> , 119.0495<br>[M-H-Glc-C <sub>7</sub> H <sub>4</sub> O <sub>3</sub> ] <sup>-</sup><br>417.1216 [M-H-Api-Glc] <sup>-</sup> , 255.0657                                                                                                                                |
| F <sub>GU</sub> -31 <sup>*C</sup> | 9.4   | FA-1 [M-H-Api-Glc] <sup>-</sup> | [M-H-Api-Glc] <sup>-</sup> , 135.0081<br>[M-H-Api-Glc-C <sub>8</sub> H <sub>8</sub> O] <sup>-</sup> , 119.0495<br>[M-H-Api-Glc-C <sub>7</sub> H <sub>4</sub> O <sub>3</sub> ] <sup>-</sup>                                                                                                                                                                               |
| F <sub>GU</sub> -32 <sup>m</sup>  | 9.51  | FA-8 [M-H-Glc] <sup>-</sup>     | 285.0695 [M-H-Glc] <sup>-</sup><br>473.1083 [M-H-C <sub>4</sub> H <sub>8</sub> O <sub>3</sub> ] <sup>-</sup> , 457.1123                                                                                                                                                                                                                                                  |
| F <sub>GU</sub> -33 <sup>C</sup>  | 9.61  | FA-5 [M-H-Rha-Glc] <sup>-</sup> | [M-H-C <sub>4</sub> H <sub>8</sub> O <sub>4</sub> ] <sup>-</sup> , 383.0755<br>[M-H-C <sub>4</sub> H <sub>8</sub> O <sub>3</sub> -C <sub>3</sub> H <sub>6</sub> O <sub>3</sub> ] <sup>-</sup> , 353.0664<br>[M-H-C <sub>4</sub> H <sub>8</sub> O <sub>3</sub> -C <sub>4</sub> H <sub>8</sub> O <sub>4</sub> ] <sup>-</sup><br>433.1127 [M-H-Api] <sup>-</sup> , 271.0609 |
| F <sub>GU</sub> -34 <sup>m</sup>  | 9.7   | FA-2 [M-H-Api-Glc] <sup>-</sup> | [M-H-Api-Glc] <sup>-</sup> , 243.0657<br>[M-H-Api-Glc-CO] <sup>-</sup>                                                                                                                                                                                                                                                                                                   |
| F <sub>GU</sub> -35 <sup>m</sup>  | 9.7   | FA-8 [M-H-Glc] <sup>-</sup>     | 285.0695 [M-H-Glc] <sup>-</sup><br>255.0657 [M-H-Glc] <sup>-</sup> , 135.0081                                                                                                                                                                                                                                                                                            |
| F <sub>GU</sub> -37 <sup>m</sup>  | 10.6  | FA-1 [M-H-Glc] <sup>-</sup>     | [M-H-Api-Glc-C <sub>8</sub> H <sub>8</sub> O] <sup>-</sup> , 119.0495<br>[M-H-Api-Glc-C <sub>7</sub> H <sub>4</sub> O <sub>3</sub> ] <sup>-</sup>                                                                                                                                                                                                                        |
| F <sub>GU</sub> -39 <sup>m</sup>  | 11    | FA-8 [M-H-Glc] <sup>-</sup>     | 285.0695 [M-H-Glc] <sup>-</sup>                                                                                                                                                                                                                                                                                                                                          |
| F <sub>GU</sub> -42 <sup>m</sup>  | 11.25 | FA-8 [M-H-Glc] <sup>-</sup>     | 285.0695 [M-H-Glc] <sup>-</sup><br>433.1127 [M-H-Api] <sup>-</sup> , 271.0624                                                                                                                                                                                                                                                                                            |
| F <sub>GU</sub> -44 <sup>m</sup>  | 11.48 | FA-2 [M-H-Api-Glc] <sup>-</sup> | [M-H-Api-Glc] <sup>-</sup> , 151.0033<br>[M-H-Api-Glc-C <sub>8</sub> H <sub>8</sub> O] <sup>-</sup>                                                                                                                                                                                                                                                                      |

|                      |       |                                 |                                                                                                                                                                                                                                          |
|----------------------|-------|---------------------------------|------------------------------------------------------------------------------------------------------------------------------------------------------------------------------------------------------------------------------------------|
| FGU-45 <sup>C</sup>  | 11.48 | FA-2 [M-H-Glc] <sup>-</sup>     | 271.0624 [M-H-Glc] <sup>-</sup> , 151.0033<br>[M-H-Glc-C <sub>8</sub> H <sub>8</sub> O] <sup>-</sup><br>417.1216 [M-H-2Glc] <sup>-</sup> , 255.0657                                                                                      |
| FGU-46 <sup>m</sup>  | 11.5  | FA-1 [M-H-2Glc] <sup>-</sup>    | [M-H-2Glc] <sup>-</sup> , 135.0081<br>[M-H-2Glc-C <sub>8</sub> H <sub>8</sub> O] <sup>-</sup> , 119.0495<br>[M-H-2Glc-C <sub>7</sub> H <sub>4</sub> O <sub>3</sub> ] <sup>-</sup><br>417.1216 [M-H-Api] <sup>-</sup> , 255.0657          |
| FGU-48 <sup>m</sup>  | 11.9  | FA-1 [M-H-Api-Glc] <sup>-</sup> | [M-H-Api-Glc] <sup>-</sup> , 135.0081<br>[M-H-Api-Glc-C <sub>8</sub> H <sub>8</sub> O] <sup>-</sup> , 119.0495<br>[M-H-Api-Glc-C <sub>7</sub> H <sub>4</sub> O <sub>3</sub> ] <sup>-</sup>                                               |
| FGU-52 <sup>m</sup>  | 12.4  | FA-6 [M-H-Glc] <sup>-</sup>     | 269.0819 [M-H-Glc] <sup>-</sup><br>283.0610 [M-H-Glc] <sup>-</sup> , 268.0359                                                                                                                                                            |
| FGU-53 <sup>m</sup>  | 12.75 | FA-7 [M-H-Glc] <sup>-</sup>     | [M-H-Glc-CH <sub>3</sub> ] <sup>-</sup> , 135.0110<br>[M-H-Glc-CH <sub>3</sub> -C <sub>8</sub> H <sub>5</sub> O <sub>2</sub> ] <sup>-</sup><br>255.0657 [M-H-2Glc] <sup>-</sup> , 135.0081                                               |
| FGU-56 <sup>m</sup>  | 13    | FA-1 [M-H-2Glc] <sup>-</sup>    | [M-H-2Glc-C <sub>8</sub> H <sub>8</sub> O] <sup>-</sup> , 119.0495<br>[M-H-2Glc-C <sub>7</sub> H <sub>4</sub> O <sub>3</sub> ] <sup>-</sup><br>267.0621 [M-H-Glc] <sup>-</sup> , 252.0420                                                |
| FGU-57 <sup>*C</sup> | 13.1  | FA-4 [M-H-Glc] <sup>-</sup>     | [M-H-Glc-CH <sub>3</sub> ] <sup>-</sup> , 135.0101<br>[M-H-Glc-CH <sub>3</sub> -C <sub>8</sub> H <sub>5</sub> O] <sup>-</sup><br>549.1609 [M-H-Ac] <sup>-</sup> , 417.1216<br>[M-H-Ac-Glc] <sup>-</sup> , 255.0657                       |
| FGU-58 <sup>m</sup>  | 13.1  | FA-1 [M-H-Ac-2Glc] <sup>-</sup> | [M-H-Ac-2Glc] <sup>-</sup> , 135.0081<br>[M-H-Ac-2Glc-C <sub>8</sub> H <sub>8</sub> O] <sup>-</sup> , 119.0495<br>[M-H-Ac-2Glc-C <sub>7</sub> H <sub>4</sub> O <sub>3</sub> ] <sup>-</sup><br>417.1216 [M-H-Glc] <sup>-</sup> , 255.0657 |
| FGU-59 <sup>*C</sup> | 13.21 | FA-1 [M-H-Api-Glc] <sup>-</sup> | [M-H-Api-Glc] <sup>-</sup> , 135.0081<br>[M-H-Api-Glc-C <sub>8</sub> H <sub>8</sub> O] <sup>-</sup> , 119.0495<br>[M-H-Api-Glc-C <sub>7</sub> H <sub>4</sub> O <sub>3</sub> ] <sup>-</sup><br>255.0657 [M-H-Glc] <sup>-</sup> , 135.0081 |
| FGU-61 <sup>C</sup>  | 13.5  | FA-1 [M-H-Glc] <sup>-</sup>     | [M-H-Glc-C <sub>8</sub> H <sub>8</sub> O] <sup>-</sup> , 119.0495<br>[M-H-Glc-C <sub>7</sub> H <sub>4</sub> O <sub>3</sub> ] <sup>-</sup><br>417.1187 [M-H-Ac] <sup>-</sup> , 255.0650                                                   |
| FGU-63 <sup>m</sup>  | 13.63 | FA-1 [M-H-Ac-Glc] <sup>-</sup>  | [M-H-Ac-Glc] <sup>-</sup> , 135.0077<br>[M-H-Ac-Glc-C <sub>8</sub> H <sub>8</sub> O] <sup>-</sup><br>417.1216 [M-H-Api] <sup>-</sup> ,                                                                                                   |
| FGU-65 <sup>*C</sup> | 13.81 | FA-1 [M-H-Api-Glc] <sup>-</sup> | 255.0657 [M-H-Api-Glc] <sup>-</sup> , 135.0081<br>[M-H-Api-Glc-C <sub>8</sub> H <sub>8</sub> O] <sup>-</sup> , 119.0495<br>[M-H-Api-Glc-C <sub>7</sub> H <sub>4</sub> O <sub>3</sub> ] <sup>-</sup>                                      |
| FGU-66 <sup>*C</sup> | 13.9  | FA-1 [M-H] <sup>-</sup>         | 135.0081 [M-H-C <sub>8</sub> H <sub>8</sub> O] <sup>-</sup> , 119.0495<br>[M-H-C <sub>7</sub> H <sub>4</sub> O <sub>3</sub> ] <sup>-</sup>                                                                                               |
| FGU-73 <sup>m</sup>  | 15.13 | FA-2 [M-H-Glc] <sup>-</sup>     | 271.0624 [M-H-Glc] <sup>-</sup> , 151.0033<br>[M-H-Glc-C <sub>8</sub> H <sub>8</sub> O] <sup>-</sup>                                                                                                                                     |

|                                   |       |                                     |                                                                                                                                                                                                                                                                                                                                                                     |
|-----------------------------------|-------|-------------------------------------|---------------------------------------------------------------------------------------------------------------------------------------------------------------------------------------------------------------------------------------------------------------------------------------------------------------------------------------------------------------------|
| F <sub>GU</sub> -74 <sup>m</sup>  | 15.2  | FA-1 [M-H-Rha-Api-Glc] <sup>-</sup> | 417.1216 [M-H-Api] <sup>-</sup> ,<br>255.0657[M-H-Api-Glc] <sup>-</sup> , 135.0081<br>[M-H-Api-Glc-C <sub>8</sub> H <sub>8</sub> O] <sup>-</sup> , 119.0495<br>[M-H-Api-Glc-C <sub>7</sub> H <sub>4</sub> O <sub>3</sub> ] <sup>-</sup>                                                                                                                             |
| F <sub>GU</sub> -79 <sup>m</sup>  | 18.56 | FA-1 [M-H-Ac-Glc] <sup>-</sup>      | 417.1557 [M-H-Ac] <sup>-</sup> , 255.065055.1<br>[M-H-Ac-Glc] <sup>-</sup> ,135.0077 [M-H<br>Ac-Glc-C <sub>8</sub> H <sub>8</sub> O] <sup>-</sup>                                                                                                                                                                                                                   |
| F <sub>GU</sub> -83 <sup>*C</sup> | 20.26 | FA-1 [M-H] <sup>-</sup>             | 135.0080 [M-H-C <sub>8</sub> H <sub>8</sub> O] <sup>-</sup> ,119.0493<br>[M-H-C <sub>7</sub> H <sub>4</sub> O <sub>3</sub> ] <sup>-</sup>                                                                                                                                                                                                                           |
| P <sub>CC</sub> -1 <sup>C</sup>   | 4.98  | FA-9                                | 425.087 [M-H-C <sub>8</sub> H <sub>8</sub> O <sub>3</sub> ] <sup>-</sup> ,289.071<br>[M-H-C <sub>15</sub> H <sub>13</sub> O <sub>6</sub> ] <sup>-</sup>                                                                                                                                                                                                             |
| P <sub>CC</sub> -2 <sup>C</sup>   | 5.73  | FA-9                                | 425.087 [M-H-C <sub>8</sub> H <sub>8</sub> O <sub>3</sub> ] <sup>-</sup> ,289.071<br>[M-H-C <sub>15</sub> H <sub>13</sub> O <sub>6</sub> ] <sup>-</sup>                                                                                                                                                                                                             |
| P <sub>CC</sub> -3 <sup>C</sup>   | 6.14  | FA-9                                | 425.087 [M-H-C <sub>8</sub> H <sub>8</sub> O <sub>3</sub> ] <sup>-</sup> ,289.071<br>[M-H-C <sub>15</sub> H <sub>13</sub> O <sub>6</sub> ] <sup>-</sup>                                                                                                                                                                                                             |
| P <sub>CC</sub> -4 <sup>C</sup>   | 6.54  | FA-9                                | 425.087 [M-H-C <sub>8</sub> H <sub>8</sub> O <sub>3</sub> ] <sup>-</sup> ,289.071<br>[M-H-C <sub>15</sub> H <sub>13</sub> O <sub>6</sub> ] <sup>-</sup>                                                                                                                                                                                                             |
| P <sub>CC</sub> -5 <sup>C</sup>   | 9.27  | FA-9                                | 425.087 [M-H-C <sub>8</sub> H <sub>8</sub> O <sub>3</sub> ] <sup>-</sup> ,289.071<br>[M-H-C <sub>15</sub> H <sub>13</sub> O <sub>6</sub> ] <sup>-</sup>                                                                                                                                                                                                             |
| P <sub>CC</sub> -6 <sup>C</sup>   | 10.46 | FA-9                                | 713.151 [M-H-C <sub>8</sub> H <sub>8</sub> O <sub>3</sub> ] <sup>-</sup> ,577.135<br>[M-H-C <sub>15</sub> H <sub>13</sub> O <sub>6</sub> ] <sup>-</sup> ,425.087<br>[M-H-C <sub>15</sub> H <sub>13</sub> O <sub>6</sub> -C <sub>8</sub> H <sub>8</sub> O <sub>3</sub> ] <sup>-</sup> ,289.071<br>[M-H-C <sub>15</sub> H <sub>13</sub> O <sub>6</sub> ] <sup>-</sup> |
| L <sub>CC</sub> -1 <sup>C</sup>   | 10.02 |                                     | 521.202 [M-H-Api] <sup>-</sup> ,359.149<br>[M-H-Api-Glc] <sup>-</sup> ,341.139<br>[M-H-Api-Glc-H <sub>2</sub> O] <sup>-</sup> ,326.115<br>[M-H-Api-Glc-H <sub>2</sub> O-CH <sub>3</sub> ] <sup>-</sup>                                                                                                                                                              |
| L <sub>CC</sub> -2 <sup>C</sup>   | 10.05 |                                     | 521.202 [M-H-Api] <sup>-</sup> ,359.149<br>[M-H-Api-Glc] <sup>-</sup> ,341.139<br>[M-H-Api-Glc-H <sub>2</sub> O] <sup>-</sup> ,326.115<br>[M-H-Api-Glc-H <sub>2</sub> O-CH <sub>3</sub> ] <sup>-</sup>                                                                                                                                                              |
| L <sub>CC</sub> -3 <sup>C</sup>   | 10.29 |                                     | 389.159 [M-H-Glc] <sup>-</sup> ,371.149<br>[M-H-Glc-H <sub>2</sub> O] <sup>-</sup> ,341.105<br>[M-H-Glc-H <sub>2</sub> O-2CH <sub>3</sub> ] <sup>-</sup>                                                                                                                                                                                                            |
| L <sub>CC</sub> -4 <sup>C</sup>   | 10.39 |                                     | 359.149 [M-H-Glc] <sup>-</sup> ,341.139<br>[M-H-Glc-H <sub>2</sub> O] <sup>-</sup> ,326.115<br>[M-H-Glc-H <sub>2</sub> O-CH <sub>3</sub> ] <sup>-</sup>                                                                                                                                                                                                             |
| D <sub>CC</sub> -1 <sup>C</sup>   | 3.04  |                                     | 381.1913 [M-H-Glc] <sup>-</sup>                                                                                                                                                                                                                                                                                                                                     |
| D <sub>CC</sub> -2 <sup>*C</sup>  | 6.05  |                                     | 347.1857 [M-H-H <sub>2</sub> O] <sup>-</sup>                                                                                                                                                                                                                                                                                                                        |
| D <sub>CC</sub> -3 <sup>*C</sup>  | 6.51  |                                     | 407.2070 [M-H-H <sub>2</sub> O] <sup>-</sup>                                                                                                                                                                                                                                                                                                                        |
| D <sub>CC</sub> -4 <sup>*C</sup>  | 14.4  |                                     | 389.1964 [M-H-H <sub>2</sub> O] <sup>-</sup>                                                                                                                                                                                                                                                                                                                        |

**Notes,** \*: the compound identified by comparison with the reference.

<sup>C</sup>: the compound identified by UNIFI.

<sup>m</sup>: the compound detected by the multiple screening modes of Qtrap-MS.

F: flavonoid; S:saponin; P: procyanidin; L: lignan; D: diterpene.

AM: the compound originated from *A. membranaceus*; GU: the compound originated from *G. uralensis*; PG: the compound originated from *P. ginseng*; and CC: the compound originated from *C. cassia*.



**Table S2 The ion transitions, corresponding  $t_R$ , and optimal DPs and CEs for 175 quantitated and semi-quantitated compounds.**

| Analyte                                                            | $t_R$<br>(min) | Ion transition<br>( $m/z$ ) | DP<br>(V) | CE<br>(eV) |
|--------------------------------------------------------------------|----------------|-----------------------------|-----------|------------|
| Re1/Re2/Re3/20-glu-Rf/NotoginsenosideM/N/Vinaginsenoside R4        | 3.61           | 1007 > 961                  | -200      | -33        |
| Q-O-Glc-Glc-Glc                                                    | 2.79           | 1025 > 979                  | -200      | -33        |
| Apigenin-6,8-di-C- $\beta$ -D-glucopyranoside*                     | 3.43           | 593 > 473                   | -150      | -38        |
| Re1/Re2/Re3/20-glu-Rf/NotoginsenosideM/N/Vinaginsenoside R4        | 3.65           | 1007 > 961                  | -200      | -33        |
| Neoliquiritin apioside                                             | 4.02           | 549 > 255                   | -164      | -41        |
| Isomer of liquiritin apioside                                      | 4.40           | 549 > 255                   | -164      | -41        |
| Calycosin-7-O- $\beta$ -D-glucoside*                               | 4.64           | 445 > 283                   | -84       | -22        |
| Liquiritin*                                                        | 4.67           | 417 > 255                   | -101      | -30        |
| Liquiritin apioside*                                               | 4.77           | 549 > 255                   | -164      | -41        |
| Catechin or epicatechin                                            | 4.97           | 289 > 245                   | -125      | -25        |
| PAC B-type dimer                                                   | 4.98           | 577 > 407                   | -135      | -25        |
| Gypenoside Gc7                                                     | 5.22           | 1007 > 961                  | -200      | -33        |
| PAC B-type dimer                                                   | 5.73           | 577 > 407                   | -135      | -25        |
| PAC B-type dimer                                                   | 6.14           | 577 > 407                   | -135      | -25        |
| Isomer of liquiritigenin-O-diglucoside                             | 6.18           | 579 > 255                   | -135      | -25        |
| PAC B-type dimer                                                   | 6.54           | 577 > 407                   | -135      | -25        |
| Isomer of calycosin                                                | 6.60           | 283 > 268                   | -90       | -27        |
| Catechin or Epicatechin                                            | 6.65           | 289 > 245                   | -125      | -25        |
| Catechin or Epicatechin                                            | 6.69           | 289 > 245                   | -125      | -25        |
| Re1/Re2/Re3/20-glu-Rf/NotoginsenosideM/N/Vinaginsenoside R4        | 7.02           | 1007 > 961                  | -200      | -33        |
| Isoliquiritin apioside*                                            | 7.06           | 549 > 255                   | -164      | -41        |
| Ginsenoside Rg1*                                                   | 7.10           | 845 > 799                   | -150      | -33        |
| Ginsenoside Re*                                                    | 7.15           | 991 > 945                   | -200      | -33        |
| Isoliquiritin*                                                     | 7.17           | 417 > 255                   | -101      | -30        |
| Isomer of calycosin,                                               | 7.20           | 283 > 268                   | -90       | -27        |
| Liquiritigenin*                                                    | 7.26           | 255 > 135                   | -80       | -24        |
| Ginsenoside Rf2                                                    | 7.27           | 847 > 801                   | -150      | -33        |
| Ononin*                                                            | 7.28           | 475 > 267                   | -100      | -21        |
| Isomer of ginsenoside Rg1                                          | 7.40           | 845 > 799                   | -150      | -33        |
| Isomer of 5'-hydroxy-4'-methoxyisoflavone-3'- $\beta$ -D-glucoside | 7.46           | 461 > 299                   | -125      | -25        |
| Re4/Notoginsenoside R1                                             | 7.71           | 977 > 931                   | -150      | -33        |
| Re1/Re2/Re3/20-glu-Rf/NotoginsenosideM/N/Vinaginsenoside R4        | 7.74           | 1007 > 961                  | -200      | -33        |
| Isomer of ginsenoside Rg1                                          | 7.80           | 845 > 799                   | -150      | -33        |
| Licuraside                                                         | 7.81           | 549 > 255                   | -164      | -41        |
| Calycosin*                                                         | 8.11           | 283 > 268                   | -90       | -27        |
| Isomer of ginsenoside Rg1                                          | 8.12           | 845 > 799                   | -150      | -33        |
| Uralsaponin C*                                                     | 8.19           | 823 > 351                   | -185      | -58        |
| Liquiritigenin-O-diglucoside                                       | 8.20           | 579 > 255                   | -135      | -25        |

|                                                                    |       |             |      |     |
|--------------------------------------------------------------------|-------|-------------|------|-----|
| Re4/Notoginsenoside R1                                             | 8.39  | 977 > 931   | -150 | -33 |
| Yunganoside G2                                                     | 8.44  | 839 > 351   | -185 | -58 |
| Floralginsenoside C                                                | 8.56  | 847 > 801   | -150 | -33 |
| 5-Hydroxy-liquiritin or 8-Hydroxy-liquiritin                       | 8.75  | 433 > 271   | -135 | -25 |
| Liquiritigenin- <i>O</i> -diglucoside                              | 8.82  | 579 > 255   | -135 | -25 |
| Uralsaponin F*                                                     | 8.88  | 895 > 351   | -185 | -58 |
| Re1/Re2/Re3/20-glu-Rf/NotoginsenosideM/N/Vinaginsenoside R4        | 8.90  | 1007 > 961  | -200 | -33 |
| g- <i>O</i> -Rha-GlcA-GlcA                                         | 8.90  | 969 > 351   | -185 | -58 |
| Neoliquiritin                                                      | 8.96  | 417 > 255   | -101 | -30 |
| Liquiritigenin- <i>O</i> -diglucoside                              | 9.00  | 579 > 255   | -135 | -25 |
| Re1/Re2/Re3/20-glu-Rf/NotoginsenosideM/N/Vinaginsenoside R4        | 9.01  | 1007 > 961  | -200 | -33 |
| 5-Hydroxy-liquiritin or 8-Hydroxy-liquiritin                       | 9.01  | 433 > 271   | -135 | -25 |
| Isomer of uralsaponin F                                            | 9.22  | 895 > 351   | -185 | -58 |
| PAC B-type dimer                                                   | 9.27  | 577 > 407   | -135 | -25 |
| Licorice-saponin A3*                                               | 9.67  | 983 > 351   | -185 | -58 |
| Ginsenoside Rf*                                                    | 9.71  | 845 > 799   | -150 | -33 |
| Uralsaponin U/Uralsaponin N                                        | 9.90  | 837 > 351   | -185 | -58 |
| Isomer of uralsaponin C                                            | 9.92  | 823 > 351   | -185 | -58 |
| 22 $\beta$ -acetoxyglycyrrhizin*                                   | 9.93  | 879 > 351   | -185 | -58 |
| 24-Hydroxyl-licorice E2/Yunganoside M                              | 10.26 | 835 > 351   | -185 | -58 |
| 24-Hydroxy-licorice-saponin A3                                     | 10.38 | 999 > 351   | -185 | -58 |
| Macedonoside C                                                     | 10.56 | 821 > 351   | -185 | -58 |
| Ginsenoside Rg2*                                                   | 10.59 | 829 > 783   | -150 | -33 |
| Isomer of liquiritin                                               | 10.60 | 417 > 255   | -101 | -30 |
| Ginsenoside Rh1*                                                   | 10.60 | 683 > 637   | -135 | -33 |
| d/e/f- <i>O</i> -Xyl(Ara)-GlcA-GlcA                                | 10.64 | 953 > 469   | -185 | -58 |
| 22-Hydroxy-licorice-saponin G2                                     | 10.67 | 853 > 501   | -185 | -58 |
| Ginsenoside Rb1*                                                   | 10.75 | 1153 > 1107 | -200 | -23 |
| 5,7-Dihydroxyl-flavone-4'- <i>O</i> -glucoside                     | 10.82 | 431 > 269   | -135 | -25 |
| Isomer of ginsenoside Rh1                                          | 10.82 | 683 > 637   | -135 | -33 |
| Vinaginsenoside R13                                                | 10.86 | 1025 > 979  | -200 | -33 |
| Acetyl-ginsenoside Re                                              | 10.90 | 1033 > 987  | -200 | -33 |
| Licorice-saponin E2*                                               | 10.98 | 819 > 351   | -185 | -58 |
| Licorice-saponin H2*                                               | 10.99 | 821 > 351   | -185 | -58 |
| Uralsaponin D                                                      | 11.01 | 849 > 497   | -185 | -58 |
| Ginsenoside Rc*                                                    | 11.02 | 1123 > 1107 | -200 | -23 |
| Isomer of licorice-saponin H2                                      | 11.04 | 821 > 351   | -185 | -58 |
| Licorice-saponin G2*                                               | 11.04 | 837 > 351   | -185 | -58 |
| Isoliquiritigenin*                                                 | 11.06 | 255 > 135   | -80  | -24 |
| Not identified                                                     | 11.08 | 851 > 351   | -185 | -58 |
| Ginsenoside Ro*                                                    | 11.09 | 955 > 793   | -200 | -50 |
| Isomer of 5'-hydroxy-4'-methoxyisoflavone-3'- $\beta$ -D-glucoside | 11.21 | 461 > 299   | -125 | -25 |
| Isomer of licorice-saponin H2                                      | 11.24 | 821 > 351   | -185 | -58 |
| Isomer of calycosin-7- <i>O</i> - $\beta$ -D-glucoside             | 11.25 | 445 > 283   | -84  | -22 |

|                                                             |       |             |      |     |
|-------------------------------------------------------------|-------|-------------|------|-----|
| Ginsenoside Rb2*                                            | 11.31 | 1123 > 1107 | -200 | -23 |
| Yunganoside E2                                              | 11.46 | 819 > 351   | -185 | -58 |
| 5-Hydroxy-liquiritin or 8-Hydroxy-liquiritin                | 11.48 | 433 > 151   | -135 | -25 |
| Isomer of liquiritigenin- <i>O</i> -diglucoside             | 11.50 | 579 > 255   | -135 | -25 |
| J/K/L- <i>O</i> -Xyl(Ara)-Rha-Glc                           | 11.50 | 961 > 915   | -150 | -33 |
| Formononetin*                                               | 11.51 | 267 > 252   | -125 | -25 |
| Ginsenoside Rb3*                                            | 11.52 | 1123 > 1077 | -200 | -23 |
| 24-Hydroxyl-licorice E2                                     | 11.56 | 835 > 483   | -185 | -58 |
| 5-Hydroxy-7-methoxyflavanone-5- <i>O</i> -glucoside         | 11.60 | 447 > 285   | -125 | -25 |
| Acetyl-ginsenoside Re                                       | 11.63 | 1033 > 987  | -200 | -33 |
| Ginsenoside Rg3*                                            | 12.06 | 829 > 783   | -150 | -33 |
| Uralsaponin E                                               | 12.17 | 835 > 483   | -185 | -58 |
| Ginsenoside Rd*                                             | 12.25 | 991 > 945   | -200 | -33 |
| Isomucronulatol- <i>O</i> -apioside                         | 12.28 | 433 > 301   | -135 | -25 |
| Isomer of uralsaponin C                                     | 12.38 | 823 > 351   | -185 | -58 |
| Genistin                                                    | 12.40 | 431 > 269   | -135 | -25 |
| Uralsaponin M                                               | 12.51 | 879 > 351   | -185 | -58 |
| 22 $\beta$ -Acetoxylglycyrrhizic acid                       | 12.52 | 865 > 485   | -185 | -58 |
| Isomer of ginsenoside Rd                                    | 12.54 | 991 > 945   | -200 | -33 |
| J/K/L- <i>O</i> -Glc-Rha-Xyl(Ara)                           | 12.56 | 961 > 915   | -150 | -33 |
| P- <i>O</i> -Glc-Glc-Glc-Glc                                | 12.72 | 1171 > 1125 | -200 | -33 |
| Isomer of calycosin-7- <i>O</i> - $\beta$ -D-glucoside      | 12.75 | 445 > 283   | -84  | -22 |
| G/H- <i>O</i> -Glc-Glc-Glc-Xyl(Ara)-Xyl(Ara)                | 12.77 | 1255 > 1029 | -200 | -33 |
| Isomer of isoliquiritigenin- <i>O</i> -diglucoside          | 13.00 | 579 > 255   | -135 | -25 |
| Isomer of ginsenoside Rg3                                   | 13.04 | 829 > 783   | -150 | -33 |
| Uralsaponin U/Uralsaponin N                                 | 13.04 | 837 > 351   | -185 | -58 |
| Acetyl-ginsenoside Re                                       | 13.09 | 1033 > 987  | -200 | -33 |
| Astragaloside II*                                           | 13.10 | 871 > 825   | -150 | -36 |
| Isomucronulatol-7- <i>O</i> - $\beta$ -D-glucoside          | 13.30 | 463 > 301   | -125 | -25 |
| Re1/2/3,20-glu-Rf,Notoginsenoside N                         | 13.56 | 1007 > 961  | -200 | -33 |
| Acetyl-liquiritin/isoliquiritin                             | 13.63 | 459 > 255   | -135 | -25 |
| Yunganoside I2/Licorice saponin B2                          | 13.64 | 807 > 351   | -185 | -55 |
| Uralsaponin U/Uralsaponin N                                 | 13.73 | 837 > 351   | -185 | -58 |
| Isomer of ginsenoside Rd                                    | 13.77 | 991 > 945   | -200 | -33 |
| Ginsenoside Ra1                                             | 13.78 | 1255 > 1209 | -200 | -50 |
| 22 $\beta$ -Acetoxyl-licorice-saponin B2                    | 13.95 | 865 > 527   | -185 | -58 |
| 22 $\beta$ -Acetoxylglycyrrhaldehyde                        | 13.96 | 863 > 351   | -185 | -58 |
| Isoastragaloside II*                                        | 13.97 | 871 > 825   | -150 | -36 |
| M/N/O- <i>O</i> -Glc-Xyl(Ara)                               | 14.00 | 831 > 785   | -150 | -33 |
| Liquiritigenin/Isoliquiritigenin- <i>O</i> -diglucoside     | 14.22 | 579 > 255   | -135 | -25 |
| Rhaoglycyrrhizin                                            | 14.30 | 967 > 469   | -185 | -58 |
| 3,9-Dimethoxy-pterocarpane-10- <i>O</i> -glucoside-apioside | 14.47 | 593 > 299   | -125 | -35 |
| Pseudoginsenoside F11                                       | 14.57 | 845 > 799   | -150 | -33 |
| r- <i>O</i> -GlcA-Glc                                       | 14.62 | 865 > 485   | -185 | -58 |

|                                                    |       |             |      |     |
|----------------------------------------------------|-------|-------------|------|-----|
| Isomer of ginsenoside Rg3                          | 14.72 | 829 > 783   | -150 | -33 |
| Ginsenoside Rg6                                    | 14.79 | 811 > 765   | -150 | -33 |
| Quinquenoside R1                                   | 14.81 | 1195 > 1149 | -200 | -33 |
| Uralsaponin P                                      | 14.90 | 823 > 351   | -185 | -58 |
| Astragaloside V                                    | 15.02 | 991 > 945   | -200 | -33 |
| Glycyrrhizic acid*                                 | 15.06 | 821 > 351   | -190 | -56 |
| Isomucronulatol-7- <i>O</i> - $\beta$ -D-glucoside | 15.07 | 463 > 301   | -125 | -25 |
| 5-Hydroxy-liquiritin or 8-Hydroxy-liquiritin       | 15.13 | 433 > 151   | -135 | -25 |
| Gypenoside XVII                                    | 15.17 | 991 > 945   | -200 | -33 |
| Notoginsenoside R2                                 | 15.24 | 815 > 769   | -150 | -33 |
| Pseudoginsenoside Rc1                              | 15.35 | 1033 > 987  | -200 | -33 |
| Ginsenoside F4*                                    | 15.41 | 811 > 765   | -150 | -33 |
| Ginsenoside Rk1                                    | 15.55 | 811 > 765   | -150 | -33 |
| G/H- <i>O</i> -Glc-Glc-Xyl(Ara)                    | 15.75 | 961 > 915   | -150 | -33 |
| Glycyrrhizoside C                                  | 15.78 | 807 > 351   | -185 | -55 |
| Cyclogalgenoside D                                 | 15.89 | 871 > 825   | -150 | -36 |
| Uralsaponin P                                      | 16.03 | 823 > 351   | -185 | -58 |
| d/e/f- <i>O</i> -GlcA-Glc                          | 16.10 | 777 > 627   | -190 | -56 |
| Pseudoginsenoside Rc1                              | 16.19 | 1033 > 987  | -200 | -33 |
| Notoginsenoside T5                                 | 16.25 | 797 > 751   | -150 | -33 |
| Astragaloside I                                    | 16.32 | 913 > 867   | -150 | -32 |
| Isomer of ginsenoside Rg2                          | 16.38 | 829 > 783   | -150 | -33 |
| 22 $\beta$ -Acetoxy-licorice-saponin B2            | 16.38 | 865 > 513   | -185 | -58 |
| Chikusetsusaponin Iva/Zingibroside R1              | 16.50 | 839 > 793   | -150 | -33 |
| Licorice saponin J2                                | 16.63 | 823 > 351   | -185 | -58 |
| Notoginsenoside T5                                 | 16.75 | 797 > 751   | -150 | -33 |
| Astragaloside VI                                   | 16.80 | 991 > 945   | -200 | -33 |
| Isoastragaloside I                                 | 17.16 | 913 > 867   | -150 | -32 |
| Astragaloside IV*                                  | 17.25 | 829 > 783   | -135 | -33 |
| Cyclosieversioside B                               | 17.29 | 913 > 867   | -150 | -32 |
| Ginsenoside Rh2                                    | 17.50 | 667 > 621   | -150 | -33 |
| Licorice-saponin B2                                | 17.55 | 807 > 351   | -185 | -58 |
| Isomer of ginsenoside Rh2                          | 17.82 | 667 > 621   | -150 | -33 |
| Resokaempferol                                     | 17.87 | 269 > 133   | -125 | -25 |
| Ginsenoside Rs2                                    | 17.88 | 1165 > 1119 | -200 | -33 |
| Astragaloside III                                  | 17.90 | 829 > 783   | -135 | -33 |
| Isomer of pratensein                               | 18.30 | 299 > 284   | -125 | -25 |
| Ginsenoside Rs2                                    | 18.37 | 1165 > 1119 | -200 | -33 |
| Acetyl-Liquiritin/Isoliquiritin                    | 18.56 | 459 > 255   | -135 | -25 |
| Quinquenoside R1                                   | 18.74 | 1195 > 1149 | -200 | -33 |
| 3-Hydroxy-9,10-dimethoxy-pterocarpane              | 18.90 | 299 > 284   | -125 | -25 |
| 10-Hydroxy-3,9-dimethoxy-pterocarpane              | 19.01 | 299 > 284   | -125 | -25 |
| Ginsenoside Rs2                                    | 19.25 | 1165 > 1119 | -200 | -33 |
| Pseudoginsenoside Rc1                              | 19.53 | 1033 > 987  | -200 | -33 |

|                       |       |             |      |     |
|-----------------------|-------|-------------|------|-----|
| Pseudoginsenoside Rc1 | 19.73 | 1033 > 987  | -200 | -33 |
| Ginsenoside Rs2       | 19.79 | 1165 > 1119 | -200 | -33 |
| Ginsenoside Rs4/Rs5   | 20.00 | 853 > 807   | -150 | -33 |
| Ginsenoside Rg5*      | 20.13 | 811 > 765   | -150 | -33 |
| Ginsenoside Rs4/Rs5   | 21.57 | 853 > 807   | -150 | -33 |

---

\*: the compound quantitated with the reference.

**Table S3 The linear regression data, limits of quantification (LOQs) and detection (LODs)  
for all targeted 36 analytes.**

| <b>Analytes</b>                                                     | <b><math>t_R</math>(min)</b> | <b>Regression equation</b> | <b><math>r^2</math></b> | <b>Linear range<br/>(<math>\mu\text{g/mL}</math>)</b> | <b>LOD<br/>(ng/mL)</b> | <b>LOQ<br/>(ng/mL)</b> |
|---------------------------------------------------------------------|------------------------------|----------------------------|-------------------------|-------------------------------------------------------|------------------------|------------------------|
| Apigenin-6,8-di- <i>C</i> - $\beta$ -D-glucopyranoside ( <b>1</b> ) | 3.43                         | $y=0.0001x+0.0244$         | 0.9997                  | 0.2-28.06                                             | 7.23                   | 22.20                  |
| Calycosin-7- <i>O</i> - $\beta$ -D-glucoside ( <b>2</b> )           | 4.64                         | $y=0.00002x+0.00035$       | 0.9999                  | 0.2-24.05                                             | 6.78                   | 18.89                  |
| Liquiritin ( <b>3</b> )                                             | 4.67                         | $y=0.0002x+0.013$          | 0.9997                  | 0.03-14.6                                             | 0.87                   | 2.80                   |
| Liquiritin aposide ( <b>4</b> )                                     | 4.77                         | $y=0.00001x+0.00042$       | 0.9996                  | 0.05-12.30                                            | 4.12                   | 12.01                  |
| Isoliquiritin aposide ( <b>5</b> )                                  | 7.06                         | $y=0.00001x-0.00075$       | 0.9998                  | 0.2-12.07                                             | 5.78                   | 25.00                  |
| Ginsenoside Rg1 ( <b>6</b> )                                        | 7.10                         | $y=0.0005x+0.0481$         | 0.9991                  | 0.02-13.00                                            | 4.12                   | 12.01                  |
| Ginsenoside Re ( <b>7</b> )                                         | 7.15                         | $y=0.00001x+0.000673$      | 0.9991                  | 0.01-4.50                                             | 3.50                   | 17.66                  |
| Isoliquiritin ( <b>8</b> )                                          | 7.17                         | $y=0.0005x+0.0125$         | 0.9997                  | 0.01-5.33                                             | 0.04                   | 0.20                   |
| Liquiritigenin ( <b>9</b> )                                         | 7.26                         | $y=0.001x+0.0618$          | 0.9991                  | 0.1-12.00                                             | 0.31                   | 0.75                   |
| Ononin ( <b>10</b> )                                                | 7.28                         | $y=0.0003x-0.0213$         | 0.9995                  | 0.03-6.88                                             | 0.45                   | 1.34                   |
| Calycosin ( <b>11</b> )                                             | 8.11                         | $y=0.0025x+0.2172$         | 0.9997                  | 0.02-8.77                                             | 0.09                   | 0.17                   |
| Uralsaponin C ( <b>12</b> )                                         | 8.19                         | $y=0.000047x-0.059422$     | 0.9993                  | 0.1-4.17                                              | 7.51                   | 13.01                  |
| Uralsaponin F ( <b>13</b> )                                         | 8.88                         | $y=0.0007x-0.0826$         | 0.9996                  | 0.15-5.04                                             | 3.95                   | 15.75                  |
| Licorice saponin A3 ( <b>14</b> )                                   | 9.67                         | $y=0.00004x-0.03274$       | 0.999                   | 0.78-25.14                                            | 4.09                   | 9.80                   |
| Ginsenoside Rf ( <b>15</b> )                                        | 9.71                         | $y=0.0017x+0.0140$         | 0.9993                  | 0.01-3.26                                             | 0.87                   | 3.18                   |
| 22 $\beta$ -Acetoxyglycyrrhizin ( <b>16</b> )                       | 9.93                         | $y=0.0006x-0.3618$         | 0.9996                  | 0.70-23.76                                            | 23.21                  | 46.41                  |
| Ginsenoside Rg2 ( <b>17</b> )                                       | 10.59                        | $y=0.0008x+0.4031$         | 0.9994                  | 0.1-9.40                                              | 4.52                   | 9.20                   |
| Ginsenoside Rh1 ( <b>18</b> )                                       | 10.60                        | $y=0.00005x+0.01752$       | 0.9997                  | 0.1-13.12                                             | 2.10                   | 5.27                   |
| Ginsenoside Rb1 ( <b>19</b> )                                       | 10.75                        | $y=0.0001x+0.0076$         | 0.999                   | 0.02-8.0                                              | 4.21                   | 15.73                  |
| Licorice saponin E2 ( <b>20</b> )                                   | 10.98                        | $y=0.0001x-0.2117$         | 0.9995                  | 0.13-16.63                                            | 4.78                   | 30.12                  |
| Licorice saponin H2 ( <b>21</b> )                                   | 10.99                        | $y=0.0011x-0.0176$         | 0.999                   | 0.02-1.3                                              | 0.74                   | 1.48                   |
| Ginsenoside Rc ( <b>22</b> )                                        | 11.02                        | $y=0.00003x+0.00566$       | 0.9991                  | 0.1-14.0                                              | 13.59                  | 27.18                  |
| Licorice saponin G2 ( <b>23</b> )                                   | 11.04                        | $y=0.0006x-0.3835$         | 0.9995                  | 0.1-13.22                                             | 7.56                   | 25.08                  |
| Isoliquiritigenin ( <b>24</b> )                                     | 11.06                        | $y=0.0003x-0.1192$         | 0.999                   | 0.02-4.45                                             | 3.21                   | 8.64                   |
| Ginsenoside Ro ( <b>25</b> )                                        | 11.09                        | $y=0.00001x+0.0032$        | 0.9993                  | 0.14-19.0                                             | 10.34                  | 37.18                  |
| Ginsenoside Rb2 ( <b>26</b> )                                       | 11.31                        | $y=0.0001x+0.0005$         | 0.9994                  | 0.05-7.07                                             | 6.90                   | 55.25                  |
| Fermononetin ( <b>27</b> )                                          | 11.34                        | $y=0.0019x-0.0286$         | 0.9998                  | 0.01-3.35                                             | 0.21                   | 0.65                   |
| Ginsenoside Rb3 ( <b>28</b> )                                       | 11.52                        | $y=0.0001x+0.0057$         | 0.9999                  | 0.10-10.75                                            | 3.80                   | 8.10                   |
| Ginsenoside Rg3 ( <b>29</b> )                                       | 12.06                        | $y=0.0006x+0.0853$         | 0.9993                  | 0.06-16.57                                            | 8.82                   | 32.25                  |
| Ginsenoside Rd ( <b>30</b> )                                        | 12.25                        | $y=0.0003x+0.0014$         | 0.9996                  | 0.20-2.34                                             | 2.28                   | 4.56                   |
| Astragaloside II ( <b>31</b> )                                      | 13.10                        | $y=0.0001x+0.0032$         | 0.9997                  | 0.03-8.24                                             | 8.05                   | 32.21                  |
| Isoastragaloside II ( <b>32</b> )                                   | 13.97                        | $y=0.00001x+0.00129$       | 0.9992                  | 0.05-6.39                                             | 5.65                   | 24.96                  |
| Glycyrrhizinic acid ( <b>33</b> )                                   | 15.06                        | $y=0.0007x-1.469$          | 0.999                   | 0.077-4.96                                            | 2.68                   | 9.68                   |
| Ginsenoside F4 ( <b>34</b> )                                        | 15.41                        | $y=0.0001x-0.016$          | 0.9995                  | 0.05-13.01                                            | 2.14                   | 9.06                   |
| Astragaloside IV ( <b>35</b> )                                      | 17.25                        | $y=0.0005x+0.0052$         | 0.9998                  | 0.02-2.21                                             | 2.15                   | 8.61                   |
| Ginsenoside Rg5 ( <b>36</b> )                                       | 20.13                        | $y=0.0004x+0.013$          | 0.9996                  | 0.01-7.55                                             | 1.21                   | 4.75                   |

**Table S4 The inter-day, intra-day precision, recovery performance, repeatability, and stability validation data for all monitored analytes ( $n = 6$ ).**

| Analytes                                                            | Intra-day | Inter-day            | Recovery | RSD   | Repeatability | Stability |
|---------------------------------------------------------------------|-----------|----------------------|----------|-------|---------------|-----------|
|                                                                     | RSD (%)   | RSD (%) <sup>a</sup> | (%)      | (%)   | RSD (%)       | RSD (%)   |
| Apigenin-6,8-di- <i>C</i> - $\beta$ - <i>D</i> -glucopyranoside (1) | 3.73      | 4.20                 | 100.82   | 10.29 | 4.40          | 3.29      |
| Calycosin-7- <i>O</i> - $\beta$ - <i>D</i> -glucoside (2)           | 4.07      | 4.96                 | 106.86   | 8.51  | 2.99          | 4.22      |
| Liquiritin (3)                                                      | 4.16      | 4.62                 | 100.84   | 8.54  | 4.78          | 4.02      |
| Liquiritin aposide (4)                                              | 2.66      | 3.88                 | 100.72   | 7.46  | 4.10          | 4.76      |
| Isoliquiritin aposide (5)                                           | 4.61      | 4.99                 | 102.04   | 3.11  | 3.14          | 1.11      |
| Ginsenoside Rg1 (6)                                                 | 4.45      | 4.83                 | 102.86   | 7.31  | 4.45          | 3.02      |
| Ginsenoside Re (7)                                                  | 2.98      | 4.30                 | 101.27   | 7.26  | 2.83          | 4.11      |
| Isoliquiritin (8)                                                   | 3.76      | 3.95                 | 101.29   | 11.06 | 2.70          | 4.16      |
| Liquiritigenin (9)                                                  | 1.70      | 3.45                 | 103.49   | 5.01  | 2.55          | 2.55      |
| Ononin (10)                                                         | 3.16      | 4.61                 | 99.91    | 6.28  | 4.10          | 4.06      |
| Calycosin (11)                                                      | 2.96      | 3.65                 | 96.13    | 6.39  | 3.08          | 1.71      |
| Uralsaponin C (12)                                                  | 2.82      | 3.69                 | 106.72   | 4.35  | 5.01          | 4.72      |
| Uralsaponin F (13)                                                  | 3.75      | 5.25                 | 101.15   | 9.95  | 1.43          | 3.44      |
| Licorice saponin A3 (14)                                            | 2.55      | 3.76                 | 100.88   | 7.70  | 1.41          | 4.29      |
| Ginsenoside Rf (15)                                                 | 1.95      | 4.13                 | 99.89    | 11.28 | 1.32          | 1.19      |
| 22 $\beta$ -Acetoxylglycyrrhizin (16)                               | 1.64      | 3.07                 | 99.59    | 9.84  | 2.04          | 3.01      |
| Ginsenoside Rg2 (17)                                                | 3.57      | 4.57                 | 98.58    | 12.65 | 4.98          | 3.71      |
| Ginsenoside Rh1 (18)                                                | 3.44      | 3.49                 | 90.68    | 6.27  | 2.16          | 2.92      |
| Ginsenoside Rb1 (19)                                                | 3.54      | 4.72                 | 102.72   | 4.86  | 2.92          | 1.71      |
| Licorice saponin E2 (20)                                            | 0.96      | 2.37                 | 108.92   | 4.67  | 4.23          | 4.23      |
| Licorice saponin H2 (21)                                            | 3.89      | 3.68                 | 103.82   | 8.32  | 3.52          | 3.47      |
| Ginsenoside Rc (22)                                                 | 1.97      | 3.72                 | 108.15   | 12.07 | 2.68          | 2.96      |
| Licorice saponin G2 (23)                                            | 3.11      | 3.33                 | 107.20   | 9.95  | 3.55          | 4.03      |
| Isoliquiritigenin (24)                                              | 3.13      | 3.25                 | 106.87   | 4.41  | 3.27          | 4.44      |
| Ginsenoside Ro (25)                                                 | 2.72      | 4.14                 | 103.77   | 11.20 | 2.40          | 4.41      |
| Ginsenoside Rb2 (26)                                                | 3.41      | 4.93                 | 103.68   | 3.74  | 4.26          | 4.63      |
| Fermononetin (27)                                                   | 1.48      | 1.39                 | 100.37   | 5.30  | 3.15          | 4.77      |
| Ginsenoside Rb3 (28)                                                | 4.56      | 4.73                 | 109.91   | 10.01 | 3.93          | 3.93      |
| Ginsenoside Rg3 (29)                                                | 2.86      | 3.58                 | 103.21   | 13.21 | 4.42          | 4.42      |
| Ginsenoside Rd (30)                                                 | 3.48      | 3.97                 | 99.50    | 8.97  | 4.04          | 4.94      |
| Astragaloside II (31)                                               | 2.81      | 2.53                 | 97.97    | 13.81 | 3.73          | 3.76      |
| Isoastragaloside II (32)                                            | 2.65      | 4.60                 | 98.78    | 12.31 | 3.81          | 3.81      |
| Glycyrrhizinic acid (33)                                            | 3.12      | 2.88                 | 97.08    | 10.86 | 1.85          | 3.14      |
| Ginsenoside F4 (34)                                                 | 2.85      | 3.50                 | 102.31   | 9.78  | 4.67          | 4.67      |
| Astragaloside IV (35)                                               | 2.74      | 4.70                 | 97.01    | 7.79  | 2.78          | 3.86      |
| Ginsenoside Rg5 (36)                                                | 3.25      | 4.07                 | 107.21   | 3.67  | 4.54          | 4.24      |

<sup>a</sup>:  $n = 3$
